# Supplementary material for: A surface proton antenna in carbonic anhydrase II supports lactate transport in cancer cells
Source: eLife. 2018 May 29;7:e35176. doi: 10.7554/eLife.35176 (PMC5986270; doi:10.7554/eLife.35176)
Supplement: Figure 1—source data 1. [file elife-35176-fig1-data1.xlsx]

## Sheet: Figure 1
Figure 1
Rate of change in intracellular pH (DpH/Dt) in MCF-7 cells
Normoxia	control					Normoxia	CAII knock-down					Hypoxia	control					Hypoxia	CAII knock-down
Batch / Cell	+ 3 mM Lac	- 3 mM Lac	+ 10 mM Lac	- 10 mM Lac		Batch / Cell	+ 3 mM Lac	- 3 mM Lac	+ 10 mM Lac	- 10 mM Lac		Batch / Cell	+ 3 mM Lac	- 3 mM Lac	+ 10 mM Lac	- 10 mM Lac		Batch / Cell	+ 3 mM Lac	- 3 mM Lac	+ 10 mM Lac	- 10 mM Lac
1 / 1	-0.13367	0.11575	-0.16165	0.23159		1 / 1	-0.03419	0.03666	-0.09189	0.0929		1 / 1	-0.09513	0.09549	-0.20078	0.16491		1 / 1	-0.0527	0.05208	-0.08366	0.10541
2	-0.02647	0.01498	-0.05234	0.05254		2	-0.04159	0.06536	-0.09893	0.1267		2	-0.14454	0.08124	-0.12504	0.25802		2	-0.05312	0.04006	-0.08319	0.12424
3	-0.0292	0.04676	-0.08253	0.12534		3	-0.04244	0.05728	-0.07963	0.1083		3	-0.13996	0.16597	-0.16487	0.19586		3	-0.0345	0.02977	-0.06321	0.04936
4	-0.07879	0.06088	-0.09968	0.06024		4	-0.0462	0.05268	-0.1048	0.13301		4	-0.20963	0.10142	-0.23543	0.2285		4	-0.02441	0.04672	-0.0622	0.06066
5	-0.08908	0.10205	-0.13826	0.11928		5	-0.04881	0.06293	-0.0891	0.12824		5	-0.05839	0.12101	-0.12533	0.1258		5	-0.03381	0.02607	-0.06371	0.06504
6	-0.13216	0.19218	-0.16061	0.21493		6	-0.05197	0.0565	-0.07767	0.11768		6	-0.09411	0.12486	-0.11987	0.1238		6	-0.03198	0.02174	-0.06459	0.07048
7	-0.03513	0.05678	-0.06877	0.06805		7	-0.04066	0.04733	-0.0704	0.11006		7	-0.09266	0.07902	-0.14114	0.18637		7	-0.10038	0.10772	-0.14291	0.16736
8	-0.05069	0.05557	-0.06458	0.06983		8	-0.07654	0.08404	-0.12857	0.14469		8	-0.06757	0.0861	-0.16005	0.20581		8	-0.06	0.07795	-0.10713	0.15392
9	-0.08624	0.09382	-0.17905	0.28122		9	-0.04933	0.06262	-0.09553	0.13831		9	-0.09787	0.07171	-0.18981	0.18549		9	-0.06592	0.06337	-0.09845	0.12952
10	-0.04801	0.02461	-0.1053	0.12099		10	-0.0455	0.0564	-0.10218	0.1365		10	-0.13098	0.17474	-0.16812	0.19165		10	-0.01933	0.01922	-0.04128	0.04632
11	-0.04669	0.04847	-0.10266	0.12676		11	-0.06096	0.06325	-0.1328	0.19205		11	-0.105	0.15733	-0.1298	0.17215		11	-0.03759	0.02481	-0.05637	0.07834
12	-0.19932	0.19723	-0.18567	0.26705		12	-0.06931	0.08213	-0.11553	0.14961		12	-0.09867	0.08841	-0.17837	0.13668		12	-0.04422	0.04587	-0.06702	0.09273
13	-0.16753	0.16957	-0.21326	0.2613		13	-0.06693	0.06909	-0.11206	0.19682		13	-0.10822	0.09669	-0.21338	0.20846		2 / 1	-0.06688	0.09952	-0.17718	0.15298
14	-0.1612	0.14388	-0.24045	0.21424		14	-0.03277	0.0415	-0.07298	0.11692		2 / 1	-0.06659	0.05233	-0.14292	0.18763		2	-0.06738	0.09862	-0.15067	0.17936
2 / 1	-0.10116	0.1666	-0.23104	0.26688		15	-0.03543	0.04893	-0.12407	0.11157		2	-0.06423	0.08243	-0.15342	0.24467		3	-0.07731	0.09247	-0.15565	0.22979
2	-0.12525	0.15801	-0.21173	0.23561		16	-0.03542	0.05795	-0.09858	0.12216		3	-0.06171	0.03869	-0.08744	0.11601		4	-0.02417	0.0169	-0.06421	0.04141
3	-0.07886	0.05029	-0.10619	0.21036		2 / 1	-0.04569	0.06017	-0.06742	0.08594		4	-0.10574	0.05903	-0.14945	0.1926		5	-0.05462	0.04079	-0.08643	0.12152
4	-0.08627	0.0905	-0.17248	0.20325		2	-0.04259	0.05576	-0.10077	0.1196		5	-0.11385	0.11862	-0.18014	0.19825		6	-0.03999	0.02487	-0.07185	0.07113
5	-0.07765	0.04081	-0.11838	0.17692		3	-0.04936	0.06115	-0.11746	0.12884		6	-0.14444	0.10416	-0.2344	0.22035		7	-0.0367	0.02285	-0.07875	0.08902
3 / 1	-0.05731	0.05073	-0.11487	0.12911		4	-0.06242	0.05158	-0.13343	0.13804		7	-0.17364	0.14228	-0.2431	0.24849		8	-0.05316	0.04345	-0.07141	0.11736
2	-0.05796	0.05601	-0.12475	0.19558		5	-0.06309	0.05145	-0.09374	0.11526		8	-0.07194	0.08627	-0.09244	0.14103		9	-0.04521	0.0397	-0.08392	0.12312
3	-0.10183	0.11141	-0.17883	0.25499		6	-0.06377	0.07813	-0.19083	0.22613		9	-0.06403	0.09834	-0.07223	0.07092		10	-0.04708	0.03545	-0.08012	0.06477
4	-0.05442	0.07136	-0.09961	0.16054		7	-0.0536	0.08033	-0.13886	0.21897		10	-0.10163	0.15036	-0.12064	0.13607		11	-0.0346	0.03232	-0.0712	0.07394
5	-0.09367	0.07729	-0.14901	0.22526		8	-0.06254	0.04817	-0.10001	0.10084		11	-0.05495	0.03419	-0.09456	0.09319		12	-0.03935	0.02571	-0.08725	0.05767
6	-0.08509	0.09274	-0.17563	0.21648		9	-0.05777	0.06925	-0.11034	0.1348		12	-0.19139	0.16301	-0.30282	0.32355		3 / 1	-0.05217	0.06928	-0.0825	0.11214
7	-0.07232	0.06772	-0.14108	0.21072		10	-0.04533	0.06231	-0.0922	0.14052		3 / 1	-0.09908	0.09035	-0.15745	0.20415		2	-0.0417	0.03364	-0.06035	0.06481
8	-0.08389	0.07378	-0.15	0.22769		11	-0.06577	0.08663	-0.12466	0.14267		2	-0.13004	0.13489	-0.21026	0.29667		3	-0.03539	0.04697	-0.08836	0.09359
9	-0.08808	0.08074	-0.13648	0.18662		12	-0.02716	0.04071	-0.06525	0.06911		3	-0.08371	0.17627	-0.14378	0.22566		4	-0.07936	0.0673	-0.12486	0.15911
10	-0.03747	0.06378	-0.08284	0.09733		13	-0.07958	0.07056	-0.10707	0.09178		4	-0.10209	0.1564	-0.24038	0.22598		5	-0.06627	0.04307	-0.09343	0.13214
11	-0.09326	0.10861	-0.18672	0.30957		14	-0.05126	0.07983	-0.09084	0.1361		5	-0.16134	0.24649	-0.35011	0.32808		6	-0.04558	0.0621	-0.09405	0.10314
12	-0.06963	0.08804	-0.17845	0.22697		15	-0.07748	0.09638	-0.1275	0.19968		6	-0.22783	0.19746	-0.32431	0.26978		7	-0.0436	0.06147	-0.09931	0.12391
4 / 1	-0.04108	0.08174	-0.08392	0.1583		16	-0.04418	0.05522	-0.06471	0.10901		7	-0.12274	0.14921	-0.14337	0.19664		8	-0.0428	0.04542	-0.10661	0.15137
2	-0.07851	0.08924	-0.16285	0.15032		3 / 1	-0.06527	0.06326	-0.09856	0.15782		8	-0.0839	0.09469	-0.13352	0.23027		9	-0.04228	0.05545	-0.0798	0.07865
3	-0.05607	0.02091	-0.09473	0.09339		2	-0.05082	0.05705	-0.08381	0.11786		9	-0.11753	0.10603	-0.19502	0.13307		10	-0.06262	0.09618	-0.11768	0.11762
4	-0.11228	0.11232	-0.17591	0.22776		3	-0.03095	0.04093	-0.06489	0.07833		10	-0.10377	0.086	-0.17084	0.25575		11	-0.03638	0.04392	-0.09054	0.09792
5	-0.02819	0.05865	-0.06886	0.07108		4	-0.07001	0.07358	-0.11729	0.12724		11	-0.10828	0.09964	-0.13388	0.20417		12	-0.04519	0.06552	-0.10994	0.10275
6	-0.06526	0.09599	-0.12478	0.16758		5	-0.04791	0.04364	-0.06475	0.10495		12	-0.09908	0.10185	-0.15373	0.2153		13	-0.0601	0.04236	-0.1723	0.17103
7	-0.06444	0.04998	-0.07617	0.10879		6	-0.03528	0.05739	-0.08183	0.10632		13	-0.1662	0.21936	-0.35244	0.33896		14	-0.03459	0.04265	-0.07677	0.07538
8	-0.04186	0.07225	-0.11695	0.14322		7	-0.059	0.08289	-0.11742	0.1406		14	-0.08596	0.0937	-0.12923	0.17739		15	-0.03529	0.03834	-0.10034	0.11686
9	-0.07848	0.04995	-0.12145	0.1375		8	-0.0482	0.06231	-0.09084	0.11817		15	-0.11467	0.10613	-0.18337	0.20853
10	-0.08847	0.07431	-0.17413	0.23759		9	-0.02464	0.02549	-0.0402	0.04616		16	-0.1255	0.11068	-0.22283	0.25475		MW	-0.0478905	0.0497872	-0.0925436	0.106817
11	-0.04354	0.03866	-0.09219	0.14851		10	-0.03181	0.02606	-0.04373	0.05641								SEM	0.00266747	0.00387025	0.00508312	0.00677208
12	-0.04859	0.04584	-0.08735	0.1078		11	-0.07928	0.08763	-0.12283	0.16384		MW	-0.111917	0.115679	-0.177319	0.202961
5 / 1	-0.0557	0.09671	-0.15238	0.17934		12	-0.04399	0.06311	-0.07776	0.1246		SEM	0.00632307	0.00723082	0.0104616	0.00950894
2	-0.0678	0.08385	-0.18594	0.10228		13	-0.04186	0.06282	-0.11516	0.14902
3	-0.05605	0.06771	-0.13946	0.10477		14	-0.04761	0.04067	-0.08035	0.10545
4	-0.07099	0.04567	-0.17018	0.17339
5	-0.04404	0.03833	-0.12409	0.11554		MW	-0.0510059	0.0604154	-0.0982441	0.127817
6	-0.09566	0.08129	-0.17786	0.20195		SEM	0.00210635	0.00234622	0.00405306	0.00549737
7	-0.08479	0.06774	-0.14419	0.17033
8	-0.05228	0.05468	-0.16572	0.10052
9	-0.06111	0.0717	-0.20133	0.30111
10	-0.05217	0.09457	-0.165	0.20025
11	-0.08361	0.08152	-0.13809	0.17643
MW	-0.0762828	0.0804548	-0.139934	0.172685
SEM	0.00480314	0.00547945	0.00613821	0.00890688

## Sheet: Figure 1-1 A+B
Figure 1 - Figure Supplement 1
Expression levels of CAII (qRT-PCR)
RPL27				CAII
Probe	Ct	MW (Ct)		Probe	Ct	MW (Ct)	DCt	MW (DCt)	SEM
CAII Normoxia 1.1	22.11			CAII Normoxia 1.1	27.26
CAII Normoxia 1.2	21.72	21.915		CAII Normoxia 1.2	26.9	27.08	5.165
CAII Normoxia 2.1	23.28			CAII Normoxia 2.1	27.53
CAII Normoxia 2.2	23.16	23.22		CAII Normoxia 2.2	27.42	27.475	4.255
CAII Normoxia 3.1	22.28			CAII Normoxia 3.1	27.97
CAII Normoxia 3.2	22.6	22.44		CAII Normoxia 3.2	27.47	27.72	5.28	4.9	0.324204
CAII Hypoxia 1.1	22.01			CAII Hypoxia 1.1	27.42
CAII Hypoxia 1.2	22.46	22.235		CAII Hypoxia 1.2	27.62	27.52	5.285
CAII Hypoxia 2.1	22			CAII Hypoxia 2.1	26.99
CAII Hypoxia 2.2	22.22	22.11		CAII Hypoxia 2.2	27	26.995	4.885
CAII Hypoxia 3.1	22.16			CAII Hypoxia 3.1	26.88
CAII Hypoxia 3.2	22.57	22.365		CAII Hypoxia 3.2	27.4	27.14	4.775	4.98167	0.154955
Neg Normoxia 1.1	23.15			Neg Normoxia 1.1	26.74
Neg Normoxia 1.2	22.97	23.06		Neg Normoxia 1.2	26.31	26.525	3.465
Neg Normoxia 2.1	22.74			Neg Normoxia 2.1	26.92
Neg Normoxia 2.2	23.24	22.99		Neg Normoxia 2.2	26.11	26.515	3.525
Neg Normoxia 3.1	22.4			Neg Normoxia 3.1	26.51
Neg Normoxia 3.2	22.92	22.66		Neg Normoxia 3.2	26.28	26.395	3.735	3.575	0.0818535
Neg Hypoxia 1.1	22.94			Neg Hypoxia 1.1	26.75
Neg Hypoxia 1.2	23.47	23.205		Neg Hypoxia 1.2	27.94	27.345	4.14
Neg Hypoxia 2.1	25.11			Neg Hypoxia 2.1	27.88
Neg Hypoxia 2.2	25.43	25.27		Neg Hypoxia 2.2	28.73	28.305	3.035
Neg Hypoxia 3.1	23.9			Neg Hypoxia 3.1	27.58
Neg Hypoxia 3.2	24.14	24.02		Neg Hypoxia 3.2	27.51	27.545	3.525	3.56667	0.319666

## Sheet: Figure 1-1 C+D
Figure 1 - Figure Supplement 1
Expression levels of CAII (western blot)
Blot 1	CAII		Actin		Ratio
siNeg Normoxie 1	53.327	45.52	82.708	78.75	0.578032
siCAII Normoxie 1	26.678	18.871	86.95	82.992	0.227383
siNeg Hypoxie 1	94.57	86.763	100.533	96.575	0.8984
siCAII Hypoxie 1	40.364	32.557	101.789	97.831	0.332788
siNeg Normoxie 2	94.908	87.101	108.669	104.711	0.831823
siCAII Normoxie 2	37.564	29.757	112.015	108.057	0.275382
siNeg Hypoxie 2	115.241	107.434	97.724	93.766	1.14577
siCAII Hypoxie 2	42.439	34.632	102.039	98.081	0.353096
siNeg Normoxie 3	101.243	93.436	120.864	116.906	0.79924
siCAII Normoxie 3	41.531	33.724	115.941	111.983	0.301153
siNeg Hypoxie 3	125.654	117.847	120.82	116.862	1.00843
siCAII Hypoxie 3	40.298	32.491	109.991	106.033	0.306423
Blank	7.807	0	3.958	0
Blot 2	CAII		Actin		Ratio
siNeg Normoxie 1	80.108	67.35	107.114	107.108	0.628805
siCAII Normoxie 1	46.8	34.042	118.227	118.221	0.287952
siNeg Hypoxie 1	128.219	115.461	138.537	138.531	0.833467
siCAII Hypoxie 1	58.311	45.553	105.238	105.232	0.432882
siNeg Normoxie 2	129.256	116.498	124.229	124.223	0.937813
siCAII Normoxie 2	55.892	43.134	99.176	99.17	0.43495
siNeg Hypoxie 2	117.306	104.548	106.634	106.628	0.980493
siCAII Hypoxie 2	64.989	52.231	98.533	98.527	0.530119
siNeg Normoxie 3	109.244	96.486	97.229	97.223	0.992419
siCAII Normoxie 3	60.803	48.045	117.649	117.643	0.408397
siNeg Hypoxie 3	100.328	87.57	99.062	99.056	0.884045
siCAII Hypoxie 3	54.058	41.3	100.736	100.73	0.410007
Blank	12.758	0	0.006	0
	MW	SEM	%
siNeg Normoxie	0.794689	0.0671912
siCAII Normoxie	0.322536	0.0331359	40.5865
siNeg Hypoxie	0.958434	0.0457654
siCAII Hypoxie	0.394219	0.0333595	41.1316

## Sheet: Figure 1-2
Figure 1 - Figure Supplement 2
Initial intracellular pH (pHi) and rate of change in intracellular pH (DpH/Dt) during application of 3 mM lactate in MCF-7 cells
Normoxia	control			Normoxia	CAII knock-down			Hypoxia	control			Hypoxia	CAII knock-down
Batch / Cell	pHi	DpH/Dt		Batch / Cell	pHi	DpH/Dt		Batch / Cell	pHi	DpH/Dt		Batch / Cell	pHi	DpH/Dt
1 / 1	7.537	0.13367		1 / 1	7.635	0.03419		1 / 1	7.816	0.09513		1 / 1	7.808	-0.0527
2	7.83	0.02647		2	7.658	0.04159		2	7.673	0.14454		2	7.753	-0.05312
3	7.669	0.0292		3	7.583	0.04244		3	7.709	0.13996		3	7.848	-0.0345
4	7.405	0.07879		4	7.721	0.0462		4	7.468	0.20963		4	7.944	-0.02441
5	7.769	0.08908		5	7.69	0.04881		5	7.866	0.05839		5	7.834	-0.03381
6	7.621	0.13216		6	7.706	0.05197		6	7.803	0.09411		6	7.703	-0.03198
7	7.647	0.03513		7	7.693	0.04066		7	7.785	0.09266		7	7.786	-0.10038
8	7.727	0.05069		8	7.662	0.07654		8	7.835	0.06757		8	7.875	-0.06
9	7.703	0.08624		9	7.678	0.04933		9	7.522	0.09787		9	7.765	-0.06592
10	7.607	0.04801		10	7.651	0.0455		10	7.869	0.13098		10	7.858	-0.01933
11	7.775	0.04669		11	7.596	0.06096		11	7.741	0.105		11	7.822	-0.03759
12	7.746	0.19932		12	7.605	0.06931		12	7.845	0.09867		12	7.793	-0.04422
13	7.507	0.16753		13	7.621	0.06693		13	7.753	0.10822		2 / 1	7.743	-0.06688
14	7.793	0.1612		14	7.652	0.03277		2 / 1	8.015	0.06659		2	7.705	-0.06738
2 / 1	7.801	0.10116		15	7.57	0.03543		2	8.033	0.06423		3	7.709	-0.07731
2	7.663	0.12525		16	7.657	0.03542		3	7.974	0.06171		4	7.844	-0.02417
3	7.739	0.07886		2 / 1	7.677	0.04569		4	7.925	0.10574		5	7.824	-0.05462
4	7.677	0.08627		2	7.62	0.04259		5	7.929	0.11385		6	7.783	-0.03999
5	7.758	0.07765		3	7.527	0.04936		6	7.918	0.14444		7	7.817	-0.0367
3 / 1	7.787	0.05731		4	7.51	0.06242		7	7.788	0.17364		8	7.741	-0.05316
2	7.896	0.05796		5	7.675	0.06309		8	7.963	0.07194		9	7.887	-0.04521
3	7.728	0.10183		6	7.522	0.06377		9	7.766	0.06403		10	7.785	-0.04708
4	7.8	0.05442		7	7.582	0.0536		10	7.926	0.10163		11	7.877	-0.0346
5	7.806	0.09367		8	7.532	0.06254		11	7.797	0.05495		12	7.779	-0.03935
6	7.773	0.08509		9	7.608	0.05777		12	7.895	0.19139		3 / 1	7.649	-0.05217
7	7.823	0.07232		10	7.627	0.04533		3 / 1	7.94	0.09908		2	7.665	-0.0417
8	7.743	0.08389		11	7.613	0.06577		2	7.844	0.13004		3	7.656	-0.03539
9	7.817	0.08808		12	7.654	0.02716		3	7.958	0.08371		4	7.631	-0.07936
10	7.799	0.03747		13	7.697	0.07958		4	7.825	0.10209		5	7.424	-0.06627
11	7.794	0.09326		14	7.522	0.05126		5	7.913	0.16134		6	7.548	-0.04558
12	7.816	0.06963		15	7.618	0.07748		6	7.906	0.22783		7	7.468	-0.0436
4 / 1	7.865	0.04108		16	7.502	0.04418		7	7.94	0.12274		8	7.666	-0.0428
2	7.79	0.07851		3 / 1	7.568	0.06527		8	7.958	0.0839		9	7.638	-0.04228
3	7.664	0.05607		2	7.556	0.05082		9	7.934	0.11753		10	7.606	-0.06262
4	7.644	0.11228		3	7.676	0.03095		10	7.938	0.10377		11	7.648	-0.03638
5	7.797	0.02819		4	7.636	0.07001		11	7.961	0.10828		12	7.623	-0.04519
6	7.82	0.06526		5	7.675	0.04791		12	7.953	0.09908		13	7.728	-0.0601
7	7.771	0.06444		6	7.731	0.03528		13	7.887	0.1662		14	7.644	-0.03459
8	7.806	0.04186		7	7.662	0.059		14	7.914	0.08596		15	7.649	-0.03529
9	7.701	0.07848		8	7.505	0.0482		15	7.924	0.11467
10	7.875	0.08847		9	7.632	0.02464		16	7.897	0.1255		MW	7.73144	-0.0478905
11	7.826	0.04354		10	7.499	0.03181						SEM	0.0183457	0.00266747
12	7.787	0.04859		11	7.503	0.07928		MW	7.86112	0.111917
5 / 1	7.584	0.0557		12	7.609	0.04399		SEM	0.0183865	0.00632307
2	7.666	0.0678		13	7.565	0.04186
3	7.706	0.05605		14	7.542	0.04761
4	7.602	0.07099
5	7.717	0.04404		MW	7.61354	0.0510059
6	7.721	0.09566		SEM	0.00972162	0.00210635
7	7.535	0.08479
8	7.628	0.05228
9	7.743	0.06111
10	7.67	0.05217
11	7.644	0.08361
MW	7.72441	0.0762828
SEM	0.0135619	0.00480314

## Sheet: Figure 1-3
Figure 1 - Figure Supplement 3
Fluorescent ratios for pH calibration
Batch / Cell	pH 8.0	pH 7.5	pH 7.0	pH 6.5	pH 6.0
1 / 1	23.1817	33.771	55.155	78.205	97.9435
2	22.8907	32.1092	55.0737	77.1347	100.505
3	22.13	32.7515	54.329	74.0572	90.3885
4	22.3945	31.8388	52.5235	74.2717	90.9905
5	22.3803	32.9658	53.7028	75.0162	93.883
6	21.9815	32.3538	53.338	73.5225	91.2192
7	21.5023	35.2923	54.1705	73.54	88.8107
8	22.7675	31.6167	53.1062	75.7232	98.6518
9	22.3095	32.7067	53.4998	75.4582	91.27
2 / 1	22.251	31.735	53.0505	73.321	91.698
2	24.4112	37.103	57.1408	76.8748	93.8495
3	22.3335	32.3065	52.4855	73.5318	90.1193
4	22.2922	30.7245	50.05	73.5742	92.9972
5	25.3152	37.0377	58.746	80.515	98.48
6	22.4383	32.5925	53.0667	75.2497	93.2502
7	24.0452	35.4035	54.8532	74.9265	91.0363
8	22.9862	32.152	54.0112	74.5132	91.9807
9	22.6845	32.8475	53.9202	75.4143	92.482
10	23.8012	33.687	54.909	75.8362	92.6928
11	23.8362	33.5748	52.7707	75.3395	92.4885
12	23.4905	33.9967	54.6682	76.6913	92.0675
13	24.7725	35.128	57.4545	79.39	95.5532
14	22.1522	30.7125	51.023	72.6743	89.3745
3 / 1	23.4205	34.689	51.6427	74.2833	87.8547
2	22.8393	34.6225	52.3157	72.4748	87.0767
3	22.5107	33.85	50.6045	73.3937	87.2545
4	25.8938	39.3725	55.773	78.9555	93.4937
5	25.0707	36.4772	53.4565	76.8252	91.139
6	27.395	41.4305	56.8015	81.6135	95.9623
7	24.408	37.2408	54.6583	77.3673	91.1305
8	24.6583	37.8912	52.283	76.6932	89.883
9	23.52	36.4355	53.6748	75.166	88.824
10	30.5455	47.1225	65.2182	89.8895	103.965
11	23.6115	36.9717	50.4943	73.718	87.8198
12	24.1593	36.8565	51.2832	73.8895	88.8608
13	25.3882	36.5095	52.995	75.5048	90.251
14	28.4535	40.2498	53.9075	77.7782	92.7178
4 / 1	24.7585	38.735	52.2125	76.1028	90.7842
2	25.4937	39.522	55.3925	78.1088	93.273
3	24.8092	39.2655	52.1825	76.4298	92.0542
4	24.8427	41.2552	58.1847	80.6637	95.752
5	25.541	39.9578	56.758	78.2812	92.6182
6	22.6658	39.1525	52.4663	75.7935	91.1897
7	24.879	39.975	56.103	79.2753	93.7555
8	23.2492	37.2607	52.6575	75.9775	89.329
9	24.2645	40.3737	55.632	78.754	92.6997
10	23.8997	38.6793	55.1325	76.6142	91.1368
11	25.0565	40.1082	55.2508	78.5667	92.8755
12	25.4932	40.307	57.1148	79.1357	93.4263
13	23.5163	37.8242	52.439	75.6473	89.9195
14	24.1802	39.54	56.1272	78.4567	93.4647
15	23.576	38.2882	54.377	77.013	91.29
16	24.95	41.6282	58.29	81.1453	96.417
MW	23.9886	36.3396	54.3109	76.5717	92.4142
SEM	0.229909	0.486228	0.352124	0.403954	0.452883
