# Supplementary material for: A surface proton antenna in carbonic anhydrase II supports lactate transport in cancer cells
Source: eLife. 2018 May 29;7:e35176. doi: 10.7554/eLife.35176 (PMC5986270; doi:10.7554/eLife.35176)
Supplement: Figure 2—source data 1. [file elife-35176-fig2-data1.xlsx]

## Sheet: Figure 2
Figure 2
Quantification of the in situ proximity ligation assay
Normorxia MCT1+CAII					Hypoxia MCT1+CAII					CAII siRNA Normoxia MCT1+CAII					Normorxia no primary Antibody
Name	PLA signals	Nuclei	Signals/Nucleus		Name	PLA signals	Nuclei	Signals/Nucleus		Name	PLA signals	Nuclei	Signals/Nucleus		Name	PLA signals	Nuclei	Signals/Nucleus
Slide 1 Pic 1	562	19	29.5789		Slide 1 Pic 1	523	26	20.1154		Slide 1 Pic 1	55	12	4.58333		Slide 1 Pic 1	1	38	0.0263158
Slide 1 Pic 2	381	28	13.6071		Slide 1 Pic 2	296	13	22.7692		Slide 1 Pic 2	156	16	9.75		Slide 1 Pic 2	12	30	0.4
Slide 1 Pic 3	614	40	15.35		Slide 1 Pic 3	202	15	13.4667		Slide 1 Pic 3	128	14	9.14286		Slide 1 Pic 3	1	31	0.0322581
Slide 2 Pic 1	98	6	16.3333		Slide 2 Pic 1	456	16	28.5		Slide 2 Pic 1	16	13	1.23077		Slide 2 Pic 1	6	23	0.26087
Slide 2 Pic 2	54	5	10.8		Slide 2 Pic 2	201	8	25.125		Slide 2 Pic 2	19	6	3.16667		Slide 2 Pic 2	3	23	0.130435
Slide 2 Pic 3	455	49	9.28571		Slide 2 Pic 3	548	25	21.92		Slide 2 Pic 3	12	8	1.5		Slide 2 Pic 3	70	35	2
Slide 3 Pic 1	210	22	9.54545		Slide 3 Pic 1	152	8	19		Slide 3 Pic 1	8	7	1.14286		Slide 3 Pic 1	3	21	0.142857
Slide 3 Pic 2	105	5	21		Slide 3 Pic 2	246	20	12.3		Slide 3 Pic 2	64	45	1.42222		Slide 3 Pic 2	15	37	0.405405
Slide 3 Pic 3	355	16	22.1875		Slide 3 Pic 3	317	16	19.8125		Slide 3 Pic 3	112	19	5.89474		Slide 3 Pic 3	9	33	0.272727
Slide 4 Pic 1	126	8	15.75		Slide 4 Pic 1	147	12	12.25
Slide 4 Pic 2	223	15	14.8667		Slide 4 Pic 2	154	15	10.2667		MW	63.3333	15.5556	4.20372		MW	13.3333	30.1111	0.407874
Slide 4 Pic 3	216	13	16.6154		Slide 4 Pic 3	223	23	9.69565		SEM	18.6748	3.94796	1.13339		SEM	7.27056	2.13076	0.20442
MW	283.25	18.8333	16.2433		MW	288.75	16.4167	17.9351
SEM	54.2295	4.05798	1.67135		SEM	41.6728	1.73842	1.7895
