# Supplementary material for: A surface proton antenna in carbonic anhydrase II supports lactate transport in cancer cells
Source: eLife. 2018 May 29;7:e35176. doi: 10.7554/eLife.35176 (PMC5986270; doi:10.7554/eLife.35176)
Supplement: Figure 3—source data 1. [file elife-35176-fig3-data1.xlsx]

## Sheet: Figure 3
Figure 3
Quantification of the cell proliferation assay
Normoxia
Control	Day 0	Day 1	Day 2	Day 3		siNeg	Day 0	Day 1	Day 2	Day 3		siCAII	Day 0	Day 1	Day 2	Day 3		AR-C155858	Day 0	Day 1	Day 2	Day 3		EZA	Day 0	Day 1	Day 2	Day 3
Picture 01	5.58756	42.6051	74.7336	365.287		Picture 01	15.3658	42.6051	96.3854	530.12		Picture 01	9.77823	13.9689	13.2705	83.8134		Picture 01	27.2394	27.9378	34.9222	99.8776		Picture 01	13.9689	34.2238	93.5916	419.067
Picture 02	14.6673	46.0974	108.259	354.112		Picture 02	12.572	34.9222	117.339	287.759		Picture 02	13.2705	9.07978	20.2549	41.2083		Picture 02	8.38134	27.9378	20.9533	20.2549		Picture 02	11.1751	52.3834	141.784	292.648
Picture 03	7.68289	31.43	88.7025	516.849		Picture 03	18.1596	35.6207	97.7823	601.361		Picture 03	9.77823	13.2705	68.4476	53.0818		Picture 03	16.7627	18.1596	40.5098	59.3678		Picture 03	16.7627	38.4145	115.942	405.098
Picture 04	8.38134	44.7005	108.259	372.97		Picture 04	13.9689	39.1129	99.8776	422.559		Picture 04	11.8736	18.858	21.6518	122.926		Picture 04	16.0642	12.572	35.6207	53.7803		Picture 04	14.6673	34.9222	132.705	431.639
Picture 05	18.858	31.43	82.4165	340.143		Picture 05	9.07978	45.3989	146.673	383.446		Picture 05	7.68289	34.2238	33.5254	95.687		Picture 05	16.7627	30.7316	25.144	23.7471		Picture 05	20.2549	23.7471	113.847	511.96
Picture 06	13.9689	57.2725	86.6072	311.506		Picture 06	15.3658	46.7958	62.86	579.709		Picture 06	13.2705	16.0642	27.2394	57.9709		Picture 06	21.6518	18.858	61.4632	70.5429		Picture 06	27.9378	34.2238	95.687	331.063
Picture 07	16.7627	34.9222	87.3056	618.822		Picture 07	10.4767	31.43	143.88	395.32		Picture 07	16.0642	24.4456	31.43	36.3191		Picture 07	7.68289	25.8425	32.8269	41.2083		Picture 07	11.8736	17.4611	127.815	408.59
Picture 08	13.9689	27.2394	71.2414	500.785		Picture 08	6.98445	34.9222	141.784	486.118		Picture 08	23.0487	13.9689	11.1751	39.8114		Picture 08	5.58756	41.2083	57.2725	74.0352		Picture 08	29.3347	25.8425	121.529	470.752
Picture 09	9.77823	44.7005	94.9885	483.324		Picture 09	16.7627	52.3834	102.671	350.619		Picture 09	15.3658	16.7627	34.2238	36.3191		Picture 09	17.4611	25.144	40.5098	29.3347		Picture 09	19.5565	20.9533	104.068	577.614
Picture 10	25.144	25.8425	78.2258	450.497		Picture 10	9.77823	34.9222	86.6072	592.98		Picture 10	12.572	20.2549	11.1751	90.7978		Picture 10	3.49222	29.3347	42.6051	66.3523		Picture 10	9.77823	44.002	103.37	539.2
Picture 11	20.9533	20.9533	143.88	491.705		Picture 11	11.8736	42.6051	134.8	452.592		Picture 11	17.4611	19.5565	37.0176	32.8269		Picture 11	6.98445	16.7627	39.1129	19.5565		Picture 11	15.3658	37.716	118.736	492.404
Picture 12	16.7627	43.3036	111.053	477.038		Picture 12	23.0487	11.8736	78.2258	414.178		Picture 12	18.1596	29.3347	47.4943	47.4943		Picture 12	13.9689	15.3658	27.9378	85.9087		Picture 12	20.9533	32.8269	106.164	514.056
MW	14.3763	37.5414	94.6393	440.253		MW	13.6197	37.716	109.074	458.064		MW	14.0271	19.149	29.7421	61.5214		MW	13.5033	24.1546	38.2399	53.6639		MW	17.6357	33.0597	114.603	449.508
SED	1.67472	3.0446	5.89116	26.3346		SED	1.28816	2.94072	7.99214	29.2303		SED	1.23232	2.06953	4.78788	8.50584		SED	2.06752	2.34101	3.43259	7.78033		SED	1.80363	2.85829	4.27834	24.3616
Hypoxia
Control	Day 0	Day 1	Day 2	Day 3		siNeg	Day 0	Day 1	Day 2	Day 3		siCAII	Day 0	Day 1	Day 2	Day 3		AR-C155858	Day 0	Day 1	Day 2	Day 3		EZA	Day 0	Day 1	Day 2	Day 3
Picture 01	5.58756	17.4611	93.5916	494.499		Picture 01	15.3658	39.8114	99.1792	387.637		Picture 01	9.77823	30.0331	10.4767	31.43		Picture 01	27.2394	16.0642	30.0331	16.7627		Picture 01	13.9689	29.3347	78.2258	437.227
Picture 02	14.6673	46.7958	122.926	260.52		Picture 02	12.572	32.1285	136.197	458.18		Picture 02	13.2705	11.8736	7.68289	21.6518		Picture 02	8.38134	11.1751	32.8269	23.0487		Picture 02	11.1751	48.8911	93.5916	489.61
Picture 03	7.68289	43.3036	113.148	462.371		Picture 03	18.1596	42.6051	140.387	507.77		Picture 03	9.77823	12.572	13.9689	34.2238		Picture 03	16.7627	24.4456	24.4456	17.4611		Picture 03	16.7627	65.6538	92.1947	469.355
Picture 04	8.38134	39.1129	93.5916	416.972		Picture 04	13.9689	28.6362	120.133	471.45		Picture 04	11.8736	32.1285	31.43	38.4145		Picture 04	16.0642	25.144	24.4456	18.1596		Picture 04	14.6673	26.5409	116.64	486.816
Picture 05	18.858	30.7316	119.434	435.131		Picture 05	9.07978	37.0176	106.862	308.713		Picture 05	7.68289	9.77823	37.0176	29.3347		Picture 05	16.7627	18.858	9.77823	64.2569		Picture 05	20.2549	18.858	108.259	374.367
Picture 06	13.9689	47.4943	106.164	500.087		Picture 06	15.3658	44.002	132.705	537.104		Picture 06	13.2705	33.5254	34.9222	18.1596		Picture 06	21.6518	6.98445	23.0487	29.3347		Picture 06	27.9378	51.6849	74.0352	291.95
Picture 07	16.7627	27.9378	92.1947	468.657		Picture 07	10.4767	44.7005	110.354	451.894		Picture 07	16.0642	28.6362	46.7958	50.9865		Picture 07	7.68289	9.07978	26.5409	39.8114		Picture 07	11.8736	54.4787	87.3056	327.571
Picture 08	13.9689	32.1285	66.3523	490.308		Picture 08	6.98445	28.6362	108.259	405.098		Picture 08	23.0487	23.7471	23.7471	31.43		Picture 08	5.58756	13.2705	20.2549	68.4476		Picture 08	29.3347	66.3523	112.45	363.89
Picture 09	9.77823	70.5429	84.5118	499.388		Picture 09	16.7627	43.3036	88.0041	428.845		Picture 09	15.3658	9.77823	25.144	20.2549		Picture 09	17.4611	11.1751	20.2549	17.4611		Picture 09	19.5565	32.1285	130.609	213.026
Picture 10	25.144	21.6518	117.339	406.495		Picture 10	9.77823	19.5565	72.6383	576.217		Picture 10	12.572	27.9378	13.2705	41.9067		Picture 10	3.49222	14.6673	37.716	25.8425		Picture 10	9.77823	34.9222	80.3212	590.186
Picture 11	20.9533	18.1596	133.403	300.331		Picture 11	11.8736	52.3834	110.354	261.917		Picture 11	17.4611	11.8736	41.2083	15.3658		Picture 11	6.98445	14.6673	48.8911	34.9222		Picture 11	15.3658	36.3191	120.133	451.894
Picture 12	16.7627	68.4476	98.4807	493.801		Picture 12	23.0487	46.7958	121.529	473.546		Picture 12	18.1596	23.7471	48.1927	11.1751		Picture 12	13.9689	37.0176	19.5565	21.6518		Picture 12	20.9533	44.7005	104.068	403.701
MW	14.3763	38.6473	103.428	435.713		MW	13.6197	38.2981	112.217	439.031		MW	14.0271	21.3026	27.8214	28.6944		MW	13.5033	16.8791	26.4827	31.43		MW	17.6357	42.4887	99.8194	408.299
SED	1.67472	5.11182	5.44042	23.0334		SED	1.28816	2.70757	5.71529	25.8472		SED	1.23232	2.71393	4.11578	3.40267		SED	2.06752	2.43446	2.89443	5.15907		SED	1.80363	4.41135	5.26364	29.3432
