# Supplementary material for: A surface proton antenna in carbonic anhydrase II supports lactate transport in cancer cells
Source: eLife. 2018 May 29;7:e35176. doi: 10.7554/eLife.35176 (PMC5986270; doi:10.7554/eLife.35176)
Supplement: Figure 4—source data 1. [file elife-35176-fig4-data1.xlsx]

## Sheet: Figure 4
Figure 4
Rate of change in intracellular H-concentration (DH/Dt) during application / removal of lactate in MCT1 expressing oocytes
MCT1						MCT1 + CAII-WT						MCT1 + CAII-E69Q
Cell No.	+ 3 mM Lac	- 3 mM Lac	+ 10 mM Lac	- 10 mM Lac		Cell No.	+ 3 mM Lac	- 3 mM Lac	+ 10 mM Lac	- 10 mM Lac		Cell No.	+ 3 mM Lac	- 3 mM Lac	+ 10 mM Lac	- 10 mM Lac
1	43.37	-45.58	78.82	-74.86		1	75.08	-73.4	132.36	-140.25		1	40.36	-47.73	68.06	-74.76
2	21.93	-23.67	44.39	-48.58		2	64.32	-67.26	139.25	-138.43		2	39.89	-42.56	70.7	-74.63
3	36.43	-34.81	65.77	-61.13		3	48.49	-46.29	105.39	-108.51		3	34.03	-34.08	64.93	-65.53
4	38.93	-36.18	70.27	-70.47		4	70.18	-69.15	147.95	-141.1		4	52.23	-54.7	122.17	-118.61
5	39.74	-38.1	81.92	-71.67		5	64.7	-56.21	138.08	-134.43		5	36.63	-34.86	70.61	-77.24
6	54.71	-51.69	103.49	-96.95		6	56.87	-51.21	116.07	-107.03		6	28.45	-33.14	56.5	-57.44
7	35.31	-37.12	62.5	-61.43		7	58.88	-57.89	137.44	-136.62		7	30.02	-35.29	84.4	-80.6
8	25.35	-23.58	42.55	-36.86		8	52.77	-57.51	108.68	-101.87		8	35.16	-36.32	66.41	-65.02
9	38.35	-23.58	82.51	-56.81		9	83.35	-91.97	169.77	-178.89		9	68.51	-56.56	117.41	-121.84
10	36.43	-34.81	75.77	-61.13		10	67.41	-68.69	125.3	-99.44		10	36.76	-36.94	79.18	-72.64
11	26.17	-25.79	47.78	-45.43		11	57.22	-57.45	132.06	-122.44
12	33.68	-36.75	63.95	-68.82		12	55.16	-54.57	97.21	-93.21		MW	40.204	-41.218	80.037	-80.831
						13	56.99	-55.54	138.46	-133.45		SEM	3.7654	2.77971	7.05463	6.9086
MW	35.8667	-34.305	68.31	-62.845		14	86.61	-84.63	168.75	-153.66
SEM	2.53238	2.5781	5.1573	4.5273		15	64.18	-63.27	135.2	-126.28
						MW	64.1473	-63.6693	132.798	-127.707
						SEM	2.82464	3.21831	5.32475	5.93016
MCT1 + CAII-D71N						MCT1 + CAII-D71N
Cell No.	+ 3 mM Lac	- 3 mM Lac	+ 10 mM Lac	- 10 mM Lac		Cell No.	+ 3 mM Lac	- 3 mM Lac	+ 10 mM Lac	- 10 mM Lac
1	51.59	-51.69	107.29	-106.28		1	33.92	-34.86	70.57	-67.97
2	86.98	-84.22	172.89	-177.38		2	41.91	-45.95	79.49	-76.26
3	93.12	-93.72	185.09	-160.3		3	35.26	-39.9	71.72	-70.71
4	65.83	-63.9	148.65	-127.24		4	31.91	-31.96	55.91	-64.84
5	35.44	-37.55	69.33	-80.11		5	29.55	-28.25	65.21	-61.74
6	66.25	-68.25	133.36	-145.76		6	40.58	-42.33	75.75	-76.48
7	44.16	-50.37	97.89	-99.29		7	30.98	-24.87	72.06	-67.67
8	77.78	-79.01	158.62	-143.44		8	43.31	-45.37	81.28	-89.2
						9	56.62	-56.21	113.59	-112.5
MW	65.1437	-66.0888	134.14	-129.975		10	80.52	-91.57	136.81	-130.95
SEM	7.22989	6.73147	14.1062	11.6453		11	38.15	-39.09	64.66	-69.36
						12	36.54	-34.94	62.68	-54.02
						13	51.78	-56.64	103.92	-104.1
						MW	42.3869	-43.9954	81.05	-80.4462
						SEM	3.86352	4.76751	6.44919	6.24082

## Sheet: Figure 4-1
Figure 4 - Figure Supplement 1
Rate of change in intracellular H-concentration (DH/Dt) during application / removal of lactate in MCT4 expressing oocytes
MCT4						MCT4 + CAII-WT						MCT4 + CAII-E69Q
Cell No.	+ 3 mM Lac	- 3 mM Lac	+ 10 mM Lac	- 10 mM Lac		Cell No.	+ 3 mM Lac	- 3 mM Lac	+ 10 mM Lac	- 10 mM Lac		Cell No.	+ 3 mM Lac	- 3 mM Lac	+ 10 mM Lac	- 10 mM Lac
1	24.74	-21.34	57.02	41.35		1	44.44	-39.84	115.7	-119.89		1	42.46	-45.8	95.22	-92.11
2	37.17	-33.53	88.01	44.95		2	76.23	-77.07	141.41	-134.04		2	48.48	-48.95	102.51	-103.23
3	50.88	-57.05	85.3	42.66		3	53.57	-48.9	134.42	-124.53		3	30.89	-31.05	78.4	-73.59
4	33.32	-35.39	78.04	29.12		4	57.53	-54.02	128.12	-124.34		4	28.37	-25.83	72.86	-84.41
5	45.9	-46.01	111.95	32.05		5	66.5	-58.97	158.55	-164.69		5	33.21	-32.35	72.23	-71.69
6	19.33	-20.31	39.77	21.84		6	67.56	-58.4	158.95	-133.35		6	24.06	-26.54	48.86	-54.03
7	55.5	-51.02	103.61	43.29		7	62.22	-60.55	127.83	-106.14		7	34.14	-35.28	66.41	-67.28
8	34.55	-33.73	67.16	32.94		8	86.47	-97.74	164.27	-168.93		8	43.28	-47.32	81.02	-80.64
MW	37.6737	-37.2975	78.8575	36.025		MW	64.315	-61.9363	141.156	-134.489		MW	35.6112	-36.64	77.1887	-78.3725
SEM	4.41708	4.68309	8.42539	2.92473		SEM	4.64645	6.34572	6.25985	7.69829		SEM	2.9502	3.32703	5.89259	5.39731
MCT4 + CAII-D71N						MCT4 + CAII-D72N
Cell No.	+ 3 mM Lac	- 3 mM Lac	+ 10 mM Lac	- 10 mM Lac		Cell No.	+ 3 mM Lac	- 3 mM Lac	+ 10 mM Lac	- 10 mM Lac
1	77.8	-67.03	165.26	-159.47		1	28.56	-31.27	70.11	-78.66
2	40.61	-36.75	114.56	-98.82		2	29.54	-25.76	55.75	-55.26
3	73.55	-74.11	143.37	-156.78		3	22.93	-19.53	50.33	-48.95
4	44.46	-40.11	101.09	-98.51		4	24.53	-23.79	73.49	-61.57
5	37.92	-46.27	100.89	-90.77		5	45.92	-47.49	109.46	-91.12
6	71.4	-62.86	144.52	-141.5		6	37.5	-32.49	86.97	-80.62
7	77.13	-62.52	169.48	-168.41		7	43.18	-41.4	90.35	-96.5
8	66.9	-66.38	137.59	-126.45		8	38.57	-36.79	84.52	-81.07
MW	61.2212	-57.0037	134.595	-130.089		MW	33.8413	-32.315	77.6225	-74.2188
SEM	6.07176	4.92192	9.45081	10.9451		SEM	3.05018	3.30872	6.8235	6.04696

## Sheet: Figure 4-2
Figure 4 - Figure Supplement 2
Quantification of protein expression in oocytes
Quantification of the b-Tubulin Signal
	Blot #1		Blot #2
	Intensity	Normalised	Intensity	Normalised
Nativ	11033.4	0.92057	9933.82	1.01141
CAII-WT	11985.4	1	9821.71	1
CAII-E69Q	12903	1.07656	9867.98	1.00471
CAII-D71N	12805	1.06838	7772.28	0.791336
CAII-D72N	11825.2	0.986637	8804.58	0.896441
Quantification of the CAII Signal
	Blot #1		Blot #2
	Intensity	Normalised	Intensity	Normalised
Nativ	25.1	0.00177421	25.86	0.00234813
CAII-WT	14147.1	1	11013	1
CAII-E69Q	13660.3	0.965585	11537.2	1.0476
CAII-D71N	15641.6	1.10564	10734.1	0.974677
CAII-D72N	13014.3	0.919921	11057.6	1.00405
Normalization CAII to b-Tubulin
	Blot #1	Blot #2	MW	SEM	MW (%)	SEM (%)
Nativ	0.00192729	0.00232163	0.00212446	0.000278836	0.212446	0.0278836
CAII-WT	1	1	1	0	100	0
CAII-E69Q	0.896914	1.04269	0.9698	0.103076	96.98	10.3076
CAII-D71N	1.03487	1.23169	1.13328	0.139169	113.328	13.9169
CAII-D72N	0.932381	1.12004	1.02621	0.132694	102.621	13.2694
