# Supplementary material for: A surface proton antenna in carbonic anhydrase II supports lactate transport in cancer cells
Source: eLife. 2018 May 29;7:e35176. doi: 10.7554/eLife.35176 (PMC5986270; doi:10.7554/eLife.35176)
Supplement: Figure 5—source data 1. [file elife-35176-fig5-data1.xlsx]

## Sheet: Figure 5 C+D
Figure 5
Rate of change in intracellular H-concentration (DH/Dt) during application / removal of lactate in MCT1 expressing oocytes in the presence of 4-MI
MCT1 + 4-MI						MCT1 + CAII-WT + 4-MI						MCT1 + CAII-E69Q + 4-MI
Cell No.	+ 3 mM Lac	- 3 mM Lac	+ 10 mM Lac	- 10 mM Lac		Cell No.	+ 3 mM Lac	- 3 mM Lac	+ 10 mM Lac	- 10 mM Lac		Cell No.	+ 3 mM Lac	- 3 mM Lac	+ 10 mM Lac	- 10 mM Lac
1	20.33	-18.5	41.87	-32.76		1	33.66	-30.07	53.53	-44.11		1	68.24	-75.57	161.34	-174.56
2	24.54	-23.77	41.72	-40.63		2	53.25	-49.37	99.39	-89.2		2	60.79	-54.63	116.39	-106.47
3	29.53	-21.11	54.12	-47.47		3	66.11	-63.02	153.16	-144.44		3	62.11	-105	120.61	-115.29
4	62.22	-77.53	113.13	-113.87		4	50.59	-36.34	107.27	-77.24		4	80.07	-56.36	131.8	-117.71
5	33.27	-30.27	58.49	-43.48		5	47.03	-56.51	93.29	-99.91		5	40.74	-40.05	88.83	-85.42
6	21.25	-24.69	53.59	-57.37		6	77.38	-64.96	131.29	-134.75		6	65.54	-60.49	135.79	-153.18
7	23.54	-23.77	41.72	-40.63		7	44.74	-39.46	104.56	-102.83		7	40.35	-38.72	90.68	-76.22
8	42.54	-43.18	104.77	-100.34		8	68.57	-67.47	131.35	-126.41		8	41.87	-43.8	84.87	-70.16
MW	32.1525	-32.8525	63.6762	-59.5688		MW	55.1662	-50.9	109.23	-102.361		MW	57.4638	-59.3275	116.289	-112.376
SEM	5.01932	6.9242	10.1717	10.738		SEM	5.09712	5.05278	10.6778	11.651		SEM	5.24537	7.81415	9.51139	12.9695
MCT1 + CAII-D71N + 4-MI						MCT1 + CAII-D72N + 4-MI
Cell No.	+ 3 mM Lac	- 3 mM Lac	+ 10 mM Lac	- 10 mM Lac		Cell No.	+ 3 mM Lac	- 3 mM Lac	+ 10 mM Lac	- 10 mM Lac
1	89.29	-109.29	163.05	-163.05		1	55.2	-52.18	125.77	-86.33
2	63.9	-70.55	154.08	-153.67		2	60	-61.65	138.47	-133.28
3	44.53	-47.67	83.98	-96.38		3	63.73	-61.68	144.77	-138.43
4	64.43	-73.73	135.15	-138.92		4	41.14	-51.65	82.52	-123.28
5	59.11	-57.41	133.08	-119.2		5	48.95	-48.19	92.53	-80.06
6	56.15	-63.32	128.09	-129.58		6	40.55	-41.97	81.78	-77.32
7	58.54	-52.47	101.35	-96.41		7	43.12	-40.12	93.12	-106.21
8	22.54	-19.33	47.12	-49.91		8	59.43	-55.31	129.39	-130.31
MW	57.3113	-61.7212	118.238	-118.39		MW	51.515	-51.5938	111.044	-109.403
SEM	6.67514	9.04959	13.636	12.986		SEM	3.27969	2.84375	9.23609	8.93952

## Sheet: Figure 5 E
Figure 5
Lactate-induced proton flux (JH) in MCT1 expressing oocytes in the absence and presence of 4-MI
MCT1
	Intrinsic buffer capacity							Flux (3 mM Lac)		Flux (10 mM Lac)
Cell No.	N 7.0	[HCO3-]	CO2 / HCO3-	[HCO3-]	DpH	d[HCO3-]	bi	DpH/Dt	J(A/B)	DpH/Dt	J(A/B)
1	7.42111	0.163229	6.8245	6.58191	0.59661	6.41868	10.7586	0.34	3.65792	0.52	5.59446
2	7.48729	0.190098	6.90585	7.93783	0.58144	7.74773	13.3251	0.33	4.39727	0.57	7.59529
3	7.52094	0.205412	6.91299	8.06941	0.60795	7.864	12.9353	0.26	3.36317	0.53	6.85569
4	7.39435	0.153475	6.82719	6.6228	0.56716	6.46933	11.4065	0.37	4.22041	0.56	6.38765
5	7.44857	0.173883	6.85513	7.06288	0.59344	6.88899	11.6086	0.37	4.29517	0.57	6.61689
6	7.19893	0.0978625	6.75157	5.56444	0.44736	5.46658	12.2196	0.31	3.78809	0.54	6.59861
7	7.49884	0.195221	6.89609	7.76143	0.60275	7.56621	12.5528	0.35	4.39348	0.61	7.65722
8	7.3252	0.130884	6.82326	6.56314	0.50194	6.43226	12.8148	0.2	2.56296	0.38	4.86962
9	7.4349	0.168495	6.71903	5.16276	0.71587	4.99426	6.97649	0.37	2.5813	0.6	4.1859
10	7.22059	0.102867	6.62059	4.11568	0.6	4.01281	6.68802	0.28	1.87265	0.58	3.87905
11	7.26872	0.114923	6.59318	3.86395	0.67554	3.74903	5.54968	0.22	1.22093	0.38	2.10888
12	7.23273	0.105783	6.78207	5.96928	0.45066	5.86349	13.0109	0.28	3.64305	0.46	5.98501
MW	7.37101	0.150178	6.79262	6.27296	0.578393	6.12278	10.8205	0.306667	3.33303	0.525	5.69452
SEM	0.033644	0.0111169	0.0303585	0.402873	0.0230768	0.394127	0.802847	0.0169819	0.303163	0.0226468	0.478045
MCT1 + 4-MI
	Intrinsic buffer capacity							Flux (3 mM Lac)		Flux (10 mM Lac)
Cell No.	N 7.0	[HCO3-]	CO2 / HCO3-	[HCO3-]	DpH	d[HCO3-]	bi	DpH/Dt	J(A/B)	DpH/Dt	J(A/B)
1	7.27624	0.11693	6.8407	6.83206	0.43554	6.71513	15.4179	0.25	3.85448	0.41	6.32136
2	7.20617	0.0995077	6.782	5.96831	0.42417	5.86881	13.836	0.27	3.73571	0.56	7.74815
3	7.24538	0.10891	6.80588	6.30568	0.4395	6.19677	14.0996	0.26	3.66589	0.45	6.34481
4	7.36163	0.142337	6.80678	6.31876	0.55485	6.17642	11.1317	0.37	4.11873	0.61	6.79033
5	7.48033	0.187075	6.90616	7.9435	0.57417	7.75642	13.5089	0.36	4.86321	0.49	6.61937
6	7.47266	0.1838	6.91054	8.02401	0.56212	7.84021	13.9476	0.2	2.78952	0.38	5.30008
7	7.30617	0.125273	6.822	6.54413	0.48417	6.41885	13.2574	0.26	3.44693	0.48	6.36357
8	7.32818	0.131785	6.82473	6.58539	0.50345	6.45361	12.8188	0.24	3.0765	0.46	5.89663
MW	7.3346	0.136952	6.83735	6.81523	0.497246	6.67828	13.5022	0.27625	3.69387	0.48	6.42304
SEM	0.0352892	0.0115639	0.0166295	0.270058	0.0216036	0.259484	0.432663	0.0207827	0.225047	0.0265922	0.249553
MCT1 + CAII-WT
	Intrinsic buffer capacity							Flux (3 mM Lac)		Flux (10 mM Lac)
Cell No.	N 7.0	[HCO3-]	CO2 / HCO3-	[HCO3-]	DpH	d[HCO3-]	bi	DpH/Dt	J(A/B)	DpH/Dt	J(A/B)
1	7.43435	0.168282	6.86629	7.24672	0.56806	7.07844	12.4607	0.61	7.60104	1.22	15.2021
2	7.49933	0.195441	6.9016	7.86053	0.59773	7.66509	12.8237	0.67	8.59185	1.27	16.286
3	7.4671	0.181462	6.82447	6.58145	0.64263	6.39999	9.95906	0.57	5.67666	0.87	8.66438
4	7.40883	0.158678	6.78349	5.98883	0.62534	5.83015	9.32316	0.6	5.5939	1.22	11.3743
5	7.36817	0.144496	6.78734	6.04215	0.58083	5.89766	10.1538	0.51	5.17846	1.18	11.9815
6	7.41239	0.159984	6.78734	6.83308	0.62505	6.6731	10.6761	0.59	6.2989	0.98	10.4626
7	7.27763	0.117305	6.72573	6.83308	0.5519	6.71578	12.1685	0.57	6.93602	0.91	11.0733
8	7.38555	0.150396	6.84967	6.83308	0.53588	6.68268	12.4705	0.52	6.48465	0.94	11.7223
9	7.44917	0.174123	6.79574	6.16016	0.65343	5.98603	9.16094	0.72	6.59588	1.54	14.1078
10	7.37142	0.145582	6.85868	7.12085	0.51274	6.97527	13.6039	0.46	6.2578	0.84	11.4273
11	7.38305	0.149533	6.84945	6.97111	0.5336	6.82157	12.7841	0.45	5.75283	0.83	10.6108
12	7.38341	0.149657	6.81074	6.37664	0.57267	6.22698	10.8736	0.46	5.00185	0.83	9.02508
13	7.45803	0.177712	6.83146	6.68824	0.62657	6.51052	10.3907	0.43	4.46802	0.83	8.62431
14	7.41981	0.162741	6.78775	6.04786	0.63206	5.88512	9.31101	0.62	5.77283	0.95	8.84546
15	7.14818	0.0870696	6.68997	4.8286	0.45821	4.74153	10.348	0.25	2.58699	0.41	4.24266
MW	7.39109	0.154831	6.80998	6.56082	0.581113	6.40599	11.1005	0.535333	5.91984	0.988	10.91
SEM	0.0220127	0.00683328	0.0140858	0.181725	0.0143124	0.177674	0.381489	0.0298068	0.357608	0.0684328	0.764365
MCT1 + CAII-WT + 4-MI
	Intrinsic buffer capacity							Flux (3 mM Lac)		Flux (10 mM Lac)
Cell No.	N 7.0	[HCO3-]	CO2 / HCO3-	[HCO3-]	DpH	d[HCO3-]	bi	DpH/Dt	J(A/B)	DpH/Dt	J(A/B)
1	7.15717	0.0888907	6.74761	5.51393	0.40956	5.42504	13.246	0.49	6.49055	0.88	11.6565
2	7.28206	0.118508	6.81551	6.44706	0.46655	6.32855	13.5646	0.44	5.96841	0.77	10.4447
3	7.33729	0.134579	6.81838	6.4898	0.51891	6.35523	12.2473	0.52	6.36858	0.88	10.7776
4	7.31326	0.127335	6.80356	6.27208	0.5097	6.14475	12.0556	0.36	4.34002	0.76	9.16227
5	7.44917	0.174123	6.83574	6.75448	0.61343	6.58035	10.7271	0.57	6.11447	1.54	16.5198
6	7.21208	0.100871	6.78419	5.99849	0.42789	5.89761	13.783	0.56	7.71849	0.88	12.1291
7	7.25345	0.110952	6.77565	5.88168	0.4778	5.77073	12.0777	0.39	4.71031	0.72	8.69595
8	7.52698	0.208289	6.9507	8.8014	0.57628	8.59311	14.9113	0.41	6.11365	0.66	9.84149
MW	7.31643	0.132943	6.81642	6.51987	0.500015	6.38692	12.8266	0.4675	5.97806	0.88625	11.1534
SEM	0.0430525	0.0140586	0.0215515	0.354034	0.0246865	0.341008	0.46059	0.0280147	0.372532	0.0978143	0.869847
MCT1 + CAII-E69Q
	Intrinsic buffer capacity							Flux (3 mM Lac)		Flux (10 mM Lac)
Cell No.	N 7.0	[HCO3-]	CO2 / HCO3-	[HCO3-]	DpH	d[HCO3-]	bi	DpH/Dt	J(A/B)	DpH/Dt	J(A/B)
1	7.4994	0.195473	6.86629	7.24672	0.63311	7.05125	11.1375	0.36	4.00949	0.55	6.12561
2	7.35163	0.139097	6.72178	6.72178	0.62985	6.58268	10.4512	0.32	3.34438	0.47	4.91206
3	7.43321	0.16784	6.9052	6.9052	0.52801	6.73736	12.7599	0.28	3.57277	0.43	5.48676
4	7.49255	0.192414	6.8644	6.8644	0.62815	6.67199	10.6216	0.53	5.62947	0.74	7.86002
5	7.0859	0.0754374	6.48351	6.8644	0.60239	6.78896	11.27	0.22	2.47941	0.48	5.40962
6	7.37008	0.145133	6.77455	6.8644	0.59553	6.71927	11.2828	0.19	2.14374	0.36	4.06182
7	7.50145	0.196398	6.85509	6.8644	0.64636	6.668	10.3162	0.31	3.19803	0.63	6.49923
8	7.34287	0.136319	6.69258	6.8644	0.65029	6.72808	10.3463	0.24	2.48311	0.39	4.03505
9	7.26465	0.113851	6.70651	6.8644	0.55814	6.75055	12.0947	0.35	4.23315	0.62	7.49873
10	7.41628	0.161423	6.89264	6.8644	0.52364	6.70298	12.8007	0.31	3.96823	0.5	6.40037
MW	7.3758	0.152339	6.77626	6.89245	0.599547	6.74011	11.3081	0.311	3.50618	0.517	5.82893
SEM	0.0405144	0.0122971	0.041204	0.0422042	0.014999	0.0388577	0.300002	0.0299796	0.326368	0.0374774	0.411658
MCT1 + CAII-E69Q + 4-MI
	Intrinsic buffer capacity							Flux (3 mM Lac)		Flux (10 mM Lac)
Cell No.	N 7.0	[HCO3-]	CO2 / HCO3-	[HCO3-]	DpH	d[HCO3-]	bi	DpH/Dt	J(A/B)	DpH/Dt	J(A/B)
1	7.45831	0.177826	6.89156	7.68089	0.56675	7.50307	13.2388	0.65	8.60519	1.22	16.1513
2	7.58197	0.236405	6.96927	9.1859	0.6127	8.94949	14.6066	0.65	9.49432	1.16	16.9437
3	7.55943	0.224448	6.99696	9.79065	0.56247	9.5662	17.0075	0.45	7.65337	0.84	14.2863
4	7.3786	0.148008	6.82092	6.52787	0.55768	6.37986	11.44	0.54	6.1776	0.82	9.38081
5	7.23536	0.106426	6.82659	6.61366	0.40877	6.50723	15.9191	0.23	3.66138	0.45	7.16357
6	7.39278	0.152921	6.85722	7.09695	0.53556	6.94403	12.9659	0.45	5.83466	1.14	14.7811
7	7.32147	0.129765	6.74499	5.48077	0.57648	5.35101	9.28221	0.38	3.52724	0.69	6.40472
8	7.56072	0.225116	6.90372	7.89899	0.657	7.67388	11.6802	0.48	5.60648	0.65	7.59211
MW	7.43608	0.175114	6.8764	7.53446	0.559676	7.35935	13.2675	0.47875	6.32003	0.87125	11.588
SEM	0.0392873	0.0152297	0.0256394	0.444755	0.0223551	0.431563	0.787447	0.0434114	0.674012	0.0866096	1.36557
MCT1 + CAII-D71N
	Intrinsic buffer capacity							Flux (3 mM Lac)		Flux (10 mM Lac)
Cell No.	N 7.0	[HCO3-]	CO2 / HCO3-	[HCO3-]	DpH	d[HCO3-]	bi	DpH/Dt	J(A/B)	DpH/Dt	J(A/B)
1	7.4381	0.169741	6.88716	7.60347	0.55094	7.43373	13.4928	0.35	4.72248	0.76	10.2545
2	7.22276	0.103382	6.72937	5.28715	0.49339	5.18377	10.5064	0.48	5.04309	0.85	8.93047
3	7.3556	0.140374	6.7575	5.64094	0.5981	5.50057	9.19674	0.65	5.97788	0.92	8.461
4	7.22884	0.10484	6.65518	4.45689	0.57366	4.35205	7.58646	0.57	4.32428	1.1	8.3451
5	7.40258	0.156411	6.82627	6.60879	0.57631	6.45237	11.196	0.55	6.15781	1.02	11.4199
6	7.34912	0.138295	6.8586	7.11954	0.49052	6.98124	14.2323	0.34	4.83899	0.69	9.8203
7	7.38118	0.14889	6.80392	6.27728	0.57726	6.12839	10.6163	0.4	4.24654	0.98	10.404
8	7.38555	0.150396	6.84967	6.83308	0.53588	6.68268	12.4705	0.52	6.48465	0.94	11.7223
MW	7.34547	0.139041	6.79596	6.22839	0.549508	6.08935	11.1622	0.4825	5.22446	0.9075	9.9197
SEM	0.0278708	0.0083599	0.0273341	0.367593	0.0141734	0.360385	0.778587	0.0392679	0.305514	0.0479117	0.452024
MCT1 + CAII-D71N + 4-MI
	Intrinsic buffer capacity							Flux (3 mM Lac)		Flux (10 mM Lac)
Cell No.	N 7.0	[HCO3-]	CO2 / HCO3-	[HCO3-]	DpH	d[HCO3-]	bi	DpH/Dt	J(A/B)	DpH/Dt	J(A/B)
1	7.44315	0.171726	6.96719	9.14201	0.47596	8.97028	18.8467	0.46	8.66949	0.89	16.7736
2	7.31422	0.127616	6.78399	5.99572	0.53023	5.86811	11.0671	0.45	4.98019	0.81	8.96435
3	7.3883	0.151351	6.86914	7.29443	0.51916	7.14308	13.7589	0.45	6.19152	0.78	10.732
4	7.29825	0.123009	6.78341	5.98772	0.51484	5.86471	11.3913	0.55	6.26523	0.95	10.8218
5	7.28369	0.118953	6.74678	5.50341	0.53691	5.38445	10.0286	0.5	5.0143	0.96	9.62745
6	7.4576	0.177536	6.86864	7.28604	0.58896	7.10851	12.0696	0.49	5.9141	0.89	10.7419
7	7.34104	0.135746	6.7816	5.96282	0.55944	5.82707	10.4159	0.59	6.14538	0.94	9.79095
8	7.27449	0.11646	6.78862	6.05999	0.48587	5.94353	12.2328	0.3	3.66983	0.77	9.41922
MW	7.35009	0.1403	6.82367	6.65402	0.526421	6.51372	12.4764	0.47375	5.85625	0.87375	10.8589
SEM	0.0223168	0.00745439	0.0226058	0.373265	0.0114888	0.36694	0.880747	0.0268192	0.449347	0.0240911	0.775793
MCT1 + CAII-D72N
	Intrinsic buffer capacity							Flux (3 mM Lac)		Flux (10 mM Lac)
Cell No.	N 7.0	[HCO3-]	CO2 / HCO3-	[HCO3-]	DpH	d[HCO3-]	bi	DpH/Dt	J(A/B)	DpH/Dt	J(A/B)
1	7.39414	0.1534	6.81555	6.44765	0.57859	6.29425	10.8786	0.27	2.93722	0.42	4.56901
2	7.37175	0.145692	6.83514	6.74515	0.53661	6.59946	12.2984	0.33	4.05848	0.65	7.99398
3	7.49393	0.193026	6.88197	7.51314	0.61196	7.32012	11.9618	0.34	4.067	0.52	6.22011
4	7.44935	0.174195	6.87727	7.43227	0.57208	7.25808	12.6872	0.3	3.80615	0.59	7.48543
5	7.34986	0.138531	6.83717	6.77675	0.51269	6.63822	12.9478	0.33	4.27278	0.59	7.63922
6	7.27816	0.117448	6.75879	5.65772	0.51937	5.54027	10.6673	0.35	3.73355	0.52	5.54699
7	7.22369	0.103604	6.75732	5.6386	0.46637	5.535	11.8683	0.24	2.84838	0.39	4.62862
8	7.36218	0.142517	6.84302	6.86865	0.51916	6.72614	12.9558	0.45	5.83011	0.78	10.1055
9	7.41714	0.161743	6.85361	7.0382	0.56353	6.87646	12.2025	0.48	5.85719	0.96	11.7144
10	7.24382	0.108519	6.80579	6.30437	0.43803	6.19585	14.1448	0.22	3.11186	0.39	5.51647
11	7.254	0.111093	6.77793	5.91264	0.47607	5.80155	12.1863	0.23	2.80286	0.44	5.36199
12	7.34169	0.135949	6.70585	5.00843	0.63584	4.87248	7.66306	0.36	2.7587	0.64	4.90436
MW	7.34831	0.140477	6.81245	6.4453	0.535858	6.30482	11.8718	0.325	3.84036	0.574167	6.80717
SEM	0.024511	0.00795248	0.015403	0.221636	0.0171343	0.2156	0.466397	0.0234682	0.312638	0.0490278	0.654726
MCT1 + CAII-D72N + 4MI
	Intrinsic buffer capacity							Flux (3 mM Lac)		Flux (10 mM Lac)
Cell No.	N 7.0	[HCO3-]	CO2 / HCO3-	[HCO3-]	DpH	d[HCO3-]	bi	DpH/Dt	J(A/B)	DpH/Dt	J(A/B)
1	7.34948	0.13841	6.89229	7.69381	0.45719	7.5554	16.5257	0.58	9.58493	1.13	18.6741
2	7.18497	0.0947669	6.75404	5.59618	0.43093	5.50141	12.7664	0.49	6.25552	0.81	10.3408
3	7.29101	0.120975	6.78533	6.01425	0.50568	5.89328	11.6542	0.53	6.17671	0.94	10.9549
4	7.22659	0.104298	6.74836	5.52347	0.47823	5.41917	11.3317	0.45	5.09927	0.72	8.15884
5	7.21103	0.100627	6.75259	5.57753	0.45844	5.4769	11.9468	0.41	4.8982	0.71	8.48224
6	7.40226	0.156296	6.85165	7.00651	0.55061	6.85021	12.4411	0.45	5.59851	0.74	9.20644
7	7.44454	0.172277	6.88621	7.58685	0.55833	7.41458	13.2799	0.36	4.78077	0.67	8.89754
8	7.38813	0.151292	6.8561	7.07867	0.53203	6.92738	13.0207	0.39	5.07805	0.68	8.85404
MW	7.31225	0.129868	6.81582	6.50966	0.49643	6.37979	12.8708	0.4575	5.934	0.8	10.4461
SEM	0.0345845	0.0102198	0.0219594	0.328811	0.0167569	0.319605	0.573938	0.0259636	0.558	0.0563788	1.2213

## Sheet: Figure 5-1
Figure 5 - Figure Supplement 1
Determination of the intrinsic buffer capacity (bi) in MCT1/MCT4 expressing oocytes in the absence and presence of 4-MI
MCT1									MCT4
Cell No.	N 7.0	[HCO3-]	CO2 / HCO3-	[HCO3-]	DpH	d[HCO3-]	bi		Cell No.	N 7.0	[HCO3-]	CO2 / HCO3-	[HCO3-]	DpH	d[HCO3-]	bi
1	7.42111	0.163229	6.8245	6.58191	0.59661	6.41868	10.7586		1	7.19758	0.0975588	6.72681	5.25608	0.47077	5.15852	10.9576
2	7.48729	0.190098	6.90585	7.93783	0.58144	7.74773	13.3251		2	7.16924	0.0913958	6.77202	5.83273	0.39722	5.74133	14.4538
3	7.52094	0.205412	6.91299	8.06941	0.60795	7.864	12.9353		3	7.31958	0.129201	6.78381	5.99324	0.53577	5.86404	10.9451
4	7.39435	0.153475	6.82719	6.6228	0.56716	6.46933	11.4065		4	7.14573	0.0865798	6.75899	6.71968	0.38674	6.6331	17.1513
5	7.44857	0.173883	6.85513	7.06288	0.59344	6.88899	11.6086		5	7.3606	0.141999	6.83228	6.71968	0.52832	6.57768	12.4502
6	7.19893	0.0978625	6.75157	5.56444	0.44736	5.46658	12.2196		6	7.38594	0.150531	6.81881	6.71968	0.56713	6.56915	11.5831
7	7.49884	0.195221	6.89609	7.76143	0.60275	7.56621	12.5528		7	7.22934	0.104961	6.69091	6.71968	0.53843	6.61472	12.2852
8	7.3252	0.130884	6.82326	6.56314	0.50194	6.43226	12.8148		8	7.32763	0.131618	6.8037	6.71968	0.52393	6.58806	12.5743
9	7.4349	0.168495	6.71903	5.16276	0.71587	4.99426	6.97649
10	7.22059	0.102867	6.62059	4.11568	0.6	4.01281	6.68802		MW	7.26695	0.116731	6.77342	6.33506	0.493539	6.21832	12.8001
11	7.26872	0.114923	6.59318	3.86395	0.67554	3.74903	5.54968		SEM	0.0326915	0.00867587	0.0167653	0.20147	0.0241089	0.19795	0.737069
12	7.23273	0.105783	6.78207	5.96928	0.45066	5.86349	13.0109
MW	7.37101	0.150178	6.79262	6.27296	0.578393	6.12278	10.8205
SEM	0.033644	0.0111169	0.0303585	0.402873	0.0230768	0.394127	0.802847
MCT1 + 4-MI									MCT4 + 4-MI
Cell No.	N 7.0	[HCO3-]	CO2 / HCO3-	[HCO3-]	DpH	d[HCO3-]	bi		Cell No.	N 7.0	[HCO3-]	CO2 / HCO3-	[HCO3-]	DpH	d[HCO3-]	bi
1	7.27624	0.11693	6.8407	6.83206	0.43554	6.71513	15.4179		1	7.37226	0.145863	6.95964	8.98445	0.41262	8.83859	21.4207
2	7.20617	0.0995077	6.782	5.96831	0.42417	5.86881	13.836		2	7.15226	0.0878914	6.72441	5.22711	0.42785	5.13922	12.0117
3	7.24538	0.10891	6.80588	6.30568	0.4395	6.19677	14.0996		3	7.56904	0.22947	6.99531	9.75353	0.57373	9.52406	16.6002
4	7.36163	0.142337	6.80678	6.31876	0.55485	6.17642	11.1317		4	7.11829	0.0812786	6.75343	5.58832	0.36486	5.50705	15.0936
5	7.48033	0.187075	6.90616	7.9435	0.57417	7.75642	13.5089		5	6.95025	0.0551997	6.59386	3.87001	0.35639	3.81481	10.704
6	7.47266	0.1838	6.91054	8.02401	0.56212	7.84021	13.9476		6	7.19079	0.0960454	6.74218	5.44542	0.44861	5.34938	11.9243
7	7.30617	0.125273	6.822	6.54413	0.48417	6.41885	13.2574		7	7.47585	0.185155	6.92945	8.38111	0.5464	8.19596	14.9999
8	7.32818	0.131785	6.82473	6.58539	0.50345	6.45361	12.8188		8	7.42493	0.164671	6.90123	7.85383	0.5237	7.68916	14.6824
MW	7.3346	0.136952	6.83735	6.81523	0.497246	6.67828	13.5022		MW	7.28171	0.130697	6.82494	6.88797	0.45677	6.75728	14.6796
SEM	0.0352892	0.0115639	0.0166295	0.270058	0.0216036	0.259484	0.432663		SEM	0.074469	0.0212474	0.0498891	0.748875	0.0291451	0.728828	1.19462
MCT1 + CAII-WT									MCT4 + CAII-WT
Cell No.	N 7.0	[HCO3-]	CO2 / HCO3-	[HCO3-]	DpH	d[HCO3-]	bi		Cell No.	N 7.0	[HCO3-]	CO2 / HCO3-	[HCO3-]	DpH	d[HCO3-]	bi
1	7.43435	0.168282	6.86629	7.24672	0.56806	7.07844	12.4607		1	7.4356	0.168767	6.90432	7.90991	0.53128	7.74115	14.5707
2	7.49933	0.195441	6.9016	7.86053	0.59773	7.66509	12.8237		2	7.17789	0.0932345	6.72432	5.22603	0.45357	5.13279	11.3164
3	7.4671	0.181462	6.82447	6.58145	0.64263	6.39999	9.95906		3	7.20857	0.100059	6.75432	5.59979	0.45425	5.49973	12.1073
4	7.40883	0.158678	6.78349	5.98883	0.62534	5.83015	9.32316		4	7.14458	0.0863508	6.71806	5.15124	0.42652	5.06489	11.8749
5	7.36817	0.144496	6.78734	6.04215	0.58083	5.89766	10.1538		5	7.08836	0.0758659	6.7298	5.29239	0.35856	5.21652	14.5485
6	7.41239	0.159984	6.78734	6.83308	0.62505	6.6731	10.6761		6	7.11663	0.0809686	6.73055	5.30154	0.38608	5.22057	13.522
7	7.27763	0.117305	6.72573	6.83308	0.5519	6.71578	12.1685		7	7.2356	0.106485	6.75432	5.59979	0.48128	5.4933	11.4139
8	7.38555	0.150396	6.84967	6.83308	0.53588	6.68268	12.4705		8	7.30495	0.124921	6.7913	6.0975	0.51365	5.97258	11.6277
9	7.44917	0.174123	6.79574	6.16016	0.65343	5.98603	9.16094
10	7.37142	0.145582	6.85868	7.12085	0.51274	6.97527	13.6039		MW	7.21402	0.104581	6.76337	5.77227	0.450649	5.66769	12.6227
11	7.38305	0.149533	6.84945	6.97111	0.5336	6.82157	12.7841		SEM	0.0399249	0.0106911	0.0217915	0.323781	0.0209855	0.313498	0.487242
12	7.38341	0.149657	6.81074	6.37664	0.57267	6.22698	10.8736
13	7.45803	0.177712	6.83146	6.68824	0.62657	6.51052	10.3907
14	7.41981	0.162741	6.78775	6.04786	0.63206	5.88512	9.31101
15	7.14818	0.0870696	6.68997	4.8286	0.45821	4.74153	10.348
MW	7.39109	0.154831	6.80998	6.56082	0.581113	6.40599	11.1005
SEM	0.0220127	0.00683328	0.0140858	0.181725	0.0143124	0.177674	0.381489
MCT1 + CAII-WT + 4-MI									MCT4 + CAII-WT + 4-MI
Cell No.	N 7.0	[HCO3-]	CO2 / HCO3-	[HCO3-]	DpH	d[HCO3-]	bi		Cell No.	N 7.0	[HCO3-]	CO2 / HCO3-	[HCO3-]	DpH	d[HCO3-]	bi
1	7.15717	0.0888907	6.74761	5.51393	0.40956	5.42504	13.246		1	7.41083	0.15941	6.96044	9.00102	0.45039	8.84161	19.631
2	7.28206	0.118508	6.81551	6.44706	0.46655	6.32855	13.5646		2	7.38808	0.151275	6.83784	6.78722	0.55024	6.63594	12.0601
3	7.33729	0.134579	6.81838	6.4898	0.51891	6.35523	12.2473		3	7.48413	0.188719	6.89403	7.7247	0.5901	7.53598	12.7707
4	7.31326	0.127335	6.80356	6.27208	0.5097	6.14475	12.0556		4	7.40682	0.157945	6.90593	7.93929	0.50089	7.78134	15.535
5	7.44917	0.174123	6.83574	6.75448	0.61343	6.58035	10.7271		5	7.33614	0.134223	6.78775	6.04786	0.54839	5.91364	10.7836
6	7.21208	0.100871	6.78419	5.99849	0.42789	5.89761	13.783		6	7.16368	0.0902332	6.75842	5.6529	0.40526	5.56267	13.7262
7	7.25345	0.110952	6.77565	5.88168	0.4778	5.77073	12.0777		7	7.33829	0.134889	6.88465	7.55965	0.45364	7.42476	16.3671
8	7.52698	0.208289	6.9507	8.8014	0.57628	8.59311	14.9113		8	7.24596	0.109055	6.75525	5.61179	0.49071	5.50274	11.2138
MW	7.31643	0.132943	6.81642	6.51987	0.500015	6.38692	12.8266		MW	7.34674	0.140719	6.84804	7.04055	0.498703	6.89983	14.0109
SEM	0.0430525	0.0140586	0.0215515	0.354034	0.0246865	0.341008	0.46059		SEM	0.0358951	0.0109293	0.0266663	0.431054	0.0218122	0.422786	1.0617
MCT1 + CAII-E69Q									MCT4 + CAII-E69Q
Cell No.	N 7.0	[HCO3-]	CO2 / HCO3-	[HCO3-]	DpH	d[HCO3-]	bi		Cell No.	N 7.0	[HCO3-]	CO2 / HCO3-	[HCO3-]	DpH	d[HCO3-]	bi
1	7.4994	0.195473	6.86629	7.24672	0.63311	7.05125	11.1375		1	7.24809	0.109591	6.68181	4.73873	0.56628	4.62914	8.17464
2	7.35163	0.139097	6.72178	6.72178	0.62985	6.58268	10.4512		2	7.10113	0.0781298	6.6285	4.19133	0.47263	4.1132	8.70279
3	7.43321	0.16784	6.9052	6.9052	0.52801	6.73736	12.7599		3	7.48303	0.188242	6.8647	7.22024	0.61833	7.032	11.3726
4	7.49255	0.192414	6.8644	6.8644	0.62815	6.67199	10.6216		4	7.49752	0.194629	6.91551	8.11637	0.58201	7.92174	13.611
5	7.0859	0.0754374	6.48351	6.8644	0.60239	6.78896	11.27		5	7.55494	0.22214	6.93481	8.48519	0.62013	8.26305	13.3247
6	7.37008	0.145133	6.77455	6.8644	0.59553	6.71927	11.2828		6	7.20285	0.0987499	6.76799	5.77885	0.43486	5.6801	13.0619
7	7.50145	0.196398	6.85509	6.8644	0.64636	6.668	10.3162		7	7.30295	0.124347	6.81468	6.43475	0.48827	6.3104	12.924
8	7.34287	0.136319	6.69258	6.8644	0.65029	6.72808	10.3463		8	7.45853	0.177917	6.87269	7.35431	0.58584	7.17639	12.2497
9	7.26465	0.113851	6.70651	6.8644	0.55814	6.75055	12.0947
10	7.41628	0.161423	6.89264	6.8644	0.52364	6.70298	12.8007		MW	7.35613	0.149218	6.81009	6.53997	0.546044	6.39075	11.6777
									SEM	0.0581142	0.018668	0.0389124	0.546838	0.0250322	0.529148	0.749541
MW	7.3758	0.152339	6.77626	6.89245	0.599547	6.74011	11.3081
SEM	0.0405144	0.0122971	0.041204	0.0422042	0.014999	0.0388577	0.300002
MCT1 + CAII-E69Q + 4-MI									MCT4 + CAII-E69Q + 4-MI
Cell No.	N 7.0	[HCO3-]	CO2 / HCO3-	[HCO3-]	DpH	d[HCO3-]	bi		Cell No.	N 7.0	[HCO3-]	CO2 / HCO3-	[HCO3-]	DpH	d[HCO3-]	bi
1	7.45831	0.177826	6.89156	7.68089	0.56675	7.50307	13.2388		1	7.17011	0.0915791	6.69783	4.91679	0.47228	4.82521	10.2168
2	7.58197	0.236405	6.96927	9.1859	0.6127	8.94949	14.6066		2	7.15585	0.088621	6.71345	5.09685	0.4424	5.00823	11.3206
3	7.55943	0.224448	6.99696	9.79065	0.56247	9.5662	17.0075		3	7.2687	0.114918	6.78231	5.97258	0.48639	5.85766	12.0431
4	7.3786	0.148008	6.82092	6.52787	0.55768	6.37986	11.44		4	7.46709	0.181458	6.92911	8.37455	0.53798	8.19309	15.2294
5	7.23536	0.106426	6.82659	6.61366	0.40877	6.50723	15.9191		5	7.34092	0.135708	6.84818	6.95075	0.49274	6.81504	13.8309
6	7.39278	0.152921	6.85722	7.09695	0.53556	6.94403	12.9659		6	7.2103	0.100458	6.79001	6.07941	0.42029	5.97895	14.2258
7	7.32147	0.129765	6.74499	5.48077	0.57648	5.35101	9.28221		7	7.38493	0.150182	6.91366	8.08187	0.47127	7.93168	16.8304
8	7.56072	0.225116	6.90372	7.89899	0.657	7.67388	11.6802		8	7.40682	0.157945	6.90593	7.93929	0.50089	7.78134	15.535
MW	7.43608	0.175114	6.8764	7.53446	0.559676	7.35935	13.2675		MW	7.30059	0.127609	6.82256	6.67651	0.47803	6.5489	13.654
SEM	0.0392873	0.0152297	0.0256394	0.444755	0.0223551	0.431563	0.787447		SEM	0.041164	0.0120353	0.032016	0.481296	0.0127371	0.469663	0.80536
MCT1 + CAII-D71N									MCT4 + CAII-D71N
Cell No.	N 7.0	[HCO3-]	CO2 / HCO3-	[HCO3-]	DpH	d[HCO3-]	bi		Cell No.	N 7.0	[HCO3-]	CO2 / HCO3-	[HCO3-]	DpH	d[HCO3-]	bi
1	7.4381	0.169741	6.88716	7.60347	0.55094	7.43373	13.4928		1	7.24729	0.10939	6.7989	6.20514	0.44839	6.09575	13.5948
2	7.22276	0.103382	6.72937	5.28715	0.49339	5.18377	10.5064		2	7.16881	0.0913054	6.71477	5.11236	0.45404	5.02106	11.0586
3	7.3556	0.140374	6.7575	5.64094	0.5981	5.50057	9.19674		3	7.48361	0.188494	6.83206	6.69748	0.65155	6.50899	9.99001
4	7.22884	0.10484	6.65518	4.45689	0.57366	4.35205	7.58646		4	7.32763	0.131618	6.88018	7.48224	0.44745	7.35062	16.4278
5	7.40258	0.156411	6.82627	6.60879	0.57631	6.45237	11.196		5	7.34353	0.136526	6.87811	7.44666	0.46542	7.31014	15.7065
6	7.34912	0.138295	6.8586	7.11954	0.49052	6.98124	14.2323		6	7.30883	0.126042	6.7711	5.82038	0.53773	5.69434	10.5896
7	7.38118	0.14889	6.80392	6.27728	0.57726	6.12839	10.6163		7	7.32954	0.132198	6.83221	6.6998	0.49733	6.5676	13.2057
8	7.38555	0.150396	6.84967	6.83308	0.53588	6.68268	12.4705		8	7.38231	0.149278	6.86681	7.2554	0.5155	7.10613	13.7849
MW	7.34547	0.139041	6.79596	6.22839	0.549508	6.08935	11.1622		MW	7.32394	0.133107	6.82177	6.58993	0.502176	6.45683	13.0447
SEM	0.0278708	0.0083599	0.0273341	0.367593	0.0141734	0.360385	0.778587		SEM	0.0325958	0.0100922	0.020428	0.296412	0.0243976	0.290836	0.831419
MCT1 + CAII-D71N + 4-MI									MCT4 + CAII-D71N + 4-MI
Cell No.	N 7.0	[HCO3-]	CO2 / HCO3-	[HCO3-]	DpH	d[HCO3-]	bi		Cell No.	N 7.0	[HCO3-]	CO2 / HCO3-	[HCO3-]	DpH	d[HCO3-]	bi
1	7.44315	0.171726	6.96719	9.14201	0.47596	8.97028	18.8467		1	7.20699	0.0996957	6.7203	5.17788	0.48669	5.07818	10.4341
2	7.31422	0.127616	6.78399	5.99572	0.53023	5.86811	11.0671		2	7.20721	0.0997462	6.79027	6.08305	0.41694	5.98331	14.3505
3	7.3883	0.151351	6.86914	7.29443	0.51916	7.14308	13.7589		3	7.26242	0.113268	6.79189	6.10579	0.47053	5.99252	12.7357
4	7.29825	0.123009	6.78341	5.98772	0.51484	5.86471	11.3913		4	7.38624	0.150635	6.83991	6.81964	0.54633	6.66901	12.2069
5	7.28369	0.118953	6.74678	5.50341	0.53691	5.38445	10.0286		5	7.25956	0.112524	6.84461	6.89385	0.41495	6.78132	16.3425
6	7.4576	0.177536	6.86864	7.28604	0.58896	7.10851	12.0696		6	7.41123	0.159557	6.8939	7.72239	0.51733	7.56283	14.619
7	7.34104	0.135746	6.7816	5.96282	0.55944	5.82707	10.4159		7	7.41822	0.162146	6.94975	8.78217	0.46847	8.62002	18.4004
8	7.27449	0.11646	6.78862	6.05999	0.48587	5.94353	12.2328		8	7.32587	0.131086	6.84461	6.89385	0.48126	6.76276	14.0522
MW	7.35009	0.1403	6.82367	6.65402	0.526421	6.51372	12.4764		MW	7.30972	0.128582	6.83441	6.80983	0.475312	6.68124	14.1427
SEM	0.0223168	0.00745439	0.0226058	0.373265	0.0114888	0.36694	0.880747		SEM	0.0310552	0.00919716	0.0245888	0.387857	0.0158646	0.379947	0.873474
MCT1 + CAII-D72N									MCT4 + CAII-D72N
Cell No.	N 7.0	[HCO3-]	CO2 / HCO3-	[HCO3-]	DpH	d[HCO3-]	bi		Cell No.	N 7.0	[HCO3-]	CO2 / HCO3-	[HCO3-]	DpH	d[HCO3-]	bi
1	7.39414	0.1534	6.81555	6.44765	0.57859	6.29425	10.8786		1	7.40569	0.157535	6.81555	6.90323	0.59014	6.7457	11.4307
2	7.37175	0.145692	6.83514	6.74515	0.53661	6.59946	12.2984		2	7.54072	0.214984	7.00913	7.00913	0.53159	6.79415	12.7808
3	7.49393	0.193026	6.88197	7.51314	0.61196	7.32012	11.9618		3	7.31958	0.129201	6.78381	5.99324	0.53577	5.86404	10.9451
4	7.44935	0.174195	6.87727	7.43227	0.57208	7.25808	12.6872		4	7.3482	0.138002	6.75953	7.00913	0.58867	6.87113	11.6723
5	7.34986	0.138531	6.83717	6.77675	0.51269	6.63822	12.9478		5	7.26352	0.113555	6.79814	7.00913	0.46538	6.89557	14.8171
6	7.27816	0.117448	6.75879	5.65772	0.51937	5.54027	10.6673		6	7.19123	0.0961427	6.7275	7.00913	0.46373	6.91299	14.9074
7	7.22369	0.103604	6.75732	5.6386	0.46637	5.535	11.8683		7	7.2957	0.122289	6.77719	7.00913	0.51851	6.88684	13.282
8	7.36218	0.142517	6.84302	6.86865	0.51916	6.72614	12.9558		8	7.27298	0.116056	6.76134	7.00913	0.51164	6.89307	13.4725
9	7.41714	0.161743	6.85361	7.0382	0.56353	6.87646	12.2025
10	7.24382	0.108519	6.80579	6.30437	0.43803	6.19585	14.1448		MW	7.3297	0.135971	6.80402	6.86891	0.525679	6.73294	12.9135
11	7.254	0.111093	6.77793	5.91264	0.47607	5.80155	12.1863		SEM	0.0374823	0.0129771	0.0307705	0.125779	0.0168936	0.125797	0.529135
12	7.34169	0.135949	6.70585	5.00843	0.63584	4.87248	7.66306
MW	7.34831	0.140477	6.81245	6.4453	0.535858	6.30482	11.8718
SEM	0.024511	0.00795248	0.015403	0.221636	0.0171343	0.2156	0.466397
MCT1 + CAII-D72N									MCT4 + CAII-D72N + 4-MI
Cell No.	N 7.0	[HCO3-]	CO2 / HCO3-	[HCO3-]	DpH	d[HCO3-]	bi		Cell No.	N 7.0	[HCO3-]	CO2 / HCO3-	[HCO3-]	DpH	d[HCO3-]	bi
1	7.34948	0.13841	6.89229	7.69381	0.45719	7.5554	16.5257		1	7.47872	0.186383	7.00195	9.90379	0.47677	9.71741	20.3818
2	7.18497	0.0947669	6.75404	5.59618	0.43093	5.50141	12.7664		2	7.31332	0.127352	6.85467	7.0554	0.45865	6.92805	15.1053
3	7.29101	0.120975	6.78533	6.01425	0.50568	5.89328	11.6542		3	7.43833	0.169831	6.86989	7.30704	0.56844	7.13721	12.5558
4	7.22659	0.104298	6.74836	5.52347	0.47823	5.41917	11.3317		4	7.45938	0.178265	6.85515	7.0632	0.60423	6.88494	11.3946
5	7.21103	0.100627	6.75259	5.57753	0.45844	5.4769	11.9468		5	7.30384	0.124602	6.84844	6.95491	0.4554	6.83031	14.9985
6	7.40226	0.156296	6.85165	7.00651	0.55061	6.85021	12.4411		6	7.30721	0.125573	6.84844	6.80127	0.45877	6.6757	14.5513
7	7.44454	0.172277	6.88621	7.58685	0.55833	7.41458	13.2799		7	7.40498	0.157277	6.84496	6.80127	0.56002	6.64399	11.8638
8	7.38813	0.151292	6.8561	7.07867	0.53203	6.92738	13.0207		8	7.31364	0.127446	6.85332	6.80127	0.46032	6.67382	14.4982
MW	7.31225	0.129868	6.81582	6.50966	0.49643	6.37979	12.8708		MW	7.37743	0.149591	6.8721	7.33602	0.505325	7.18643	14.4187
SEM	0.0345845	0.0102198	0.0219594	0.328811	0.0167569	0.319605	0.573938		SEM	0.0267157	0.0092879	0.0187397	0.372026	0.0217274	0.366222	0.995819

## Sheet: Figure 5-2 A+B
Figure 5 - Figure Supplement 2
Rate of change in intracellular H-concentration (DH/Dt) during application / removal of lactate in MCT4 expressing oocytes in the presence of 4-MI
MCT4 + 4-MI						MCT4 + CAII-WT + 4-MI						MCT4 + CAII-E69Q + 4-MI
Cell No.	+ 3 mM Lac	- 3 mM Lac	+ 10 mM Lac	- 10 mM Lac		Cell No.	+ 3 mM Lac	- 3 mM Lac	+ 10 mM Lac	- 10 mM Lac		Cell No.	+ 3 mM Lac	- 3 mM Lac	+ 10 mM Lac	- 10 mM Lac
1	27.8	-26.9	60.92	-58.56		1	43.66	-40.07	73.53	-74.11		1	90.59	-92.92	180.14	-189.54
2	43.16	-36.9	73.9	-75.1		2	43.3	-38.65	119.54	-79.89		2	69.43	-79.36	155.15	-150.09
3	39.24	-34.7	128.69	-100		3	52.39	-57.12	175.28	-165.18		3	55.48	-55.38	103.26	-109.03
4	37.87	-36.47	84.71	-78.33		4	58.09	-58.36	124.73	-117.71		4	46.32	-44.05	88.12	-86.52
5	19.83	-19.89	49.25	-49.25		5	82.3	-84.57	152.98	-146.78		5	55.94	-50.74	94.1	-108.76
6	30.65	-32.4	78.63	-78.6		6	72.52	-76.08	151.72	-145.99		6	62.38	-60.41	120.18	-119.43
7	48.08	-45.38	104.9	-101.28		7	64.11	-64.6	141.93	-129.28		7	42.59	-41.96	92.76	-82.23
8	47.82	-47.82	95.1	-82.28		8	81.41	-82.78	160.55	-158.89		8	58.09	-58.36	124.73	-117.71
MW	36.8062	-35.0575	84.5125	-77.925		MW	62.2225	-62.7787	137.532	-127.229		MW	60.1025	-60.3975	119.805	-120.414
SEM	3.54318	3.2144	8.89092	6.34933		SEM	5.50527	6.27435	11.1786	12.1995		SEM	5.27979	6.19197	11.6372	12.3488
MCT4 + CAII-D71N + 4-MI						MCT4 + CAII-D72N + 4-MI
Cell No.	+ 3 mM Lac	- 3 mM Lac	+ 10 mM Lac	- 10 mM Lac		Cell No.	+ 3 mM Lac	- 3 mM Lac	+ 10 mM Lac	- 10 mM Lac
1	73.03	-74.95	158.59	-149.59		1	43.5	-45.98	81.12	-79.4
2	63.28	-61.32	152.55	-120.5		2	55.86	-48.03	116.81	-117.79
3	61.88	-57.31	119.75	-111.88		3	41.82	-44.09	126.8	-115.65
4	45.6	-43.83	95.66	-103.87		4	46.17	-43.29	81.68	-78.05
5	56.31	-51.42	109.32	-94.89		5	53.94	-49.3	118.24	-117.46
6	33.54	-36.67	86.16	-96.16		6	64.29	-54.76	141.91	-124.37
7	58.09	-58.36	124.73	-117.71		7	57.16	-57.4	151.68	-138.64
8						8	62.01	-52.21	120.89	-119.36
MW	55.9614	-54.8371	120.966	-113.514		MW	53.0938	-49.3825	117.391	-111.34
SEM	4.86645	4.70045	10.2542	7.09054		SEM	2.9786	1.79152	8.93389	7.56568
	12.4359	-12.186	26.8813	-25.2254

## Sheet: Figure 5-2 C
Figure 5 - Figure Supplement 2
Lactate-induced proton flux (JH) in MCT4 expressing oocytes in the absence and presence of 4-MI
MCT4
	Intrinsic buffer capacity							Flux (3 mM Lac)		Flux (10 mM Lac)
Cell No.	N 7.0	[HCO3-]	CO2 / HCO3-	[HCO3-]	DpH	d[HCO3-]	bi	DpH/Dt	J(A/B)	DpH/Dt	J(A/B)
1	7.19758	0.0975588	6.72681	5.25608	0.47077	5.15852	10.9576	0.22	2.41068	0.31	3.39686
2	7.16924	0.0913958	6.77202	5.83273	0.39722	5.74133	14.4538	0.25	3.61345	0.39	5.63697
3	7.31958	0.129201	6.78381	5.99324	0.53577	5.86404	10.9451	0.34	3.72132	0.56	6.12924
4	7.14573	0.0865798	6.75899	6.71968	0.38674	6.6331	17.1513	0.19	3.25875	0.32	5.48842
5	7.3606	0.141999	6.83228	6.71968	0.52832	6.57768	12.4502	0.25	3.11255	0.54	6.7231
6	7.38594	0.150531	6.81881	6.71968	0.56713	6.56915	11.5831	0.22	2.54829	0.36	4.16993
7	7.22934	0.104961	6.69091	6.71968	0.53843	6.61472	12.2852	0.33	4.05412	0.66	8.10823
8	7.32763	0.131618	6.8037	6.71968	0.52393	6.58806	12.5743	0.3	3.77229	0.61	7.67033
MW	7.26695	0.116731	6.77342	6.33506	0.493539	6.21832	12.8001	0.2625	3.31143	0.46875	5.91539
SEM	0.0326915	0.00867587	0.0167653	0.20147	0.0241089	0.19795	0.737069	0.019434	0.20956	0.0491513	0.57065
MCT4 + 4-MI
	Intrinsic buffer capacity							Flux (3 mM Lac)		Flux (10 mM Lac)
Cell No.	N 7.0	[HCO3-]	CO2 / HCO3-	[HCO3-]	DpH	d[HCO3-]	bi	DpH/Dt	J(A/B)	DpH/Dt	J(A/B)
1	7.37226	0.145863	6.95964	8.98445	0.41262	8.83859	21.4207	0.21	4.49834	0.33	7.06882
2	7.15226	0.0878914	6.72441	5.22711	0.42785	5.13922	12.0117	0.23	2.7627	0.46	5.5254
3	7.56904	0.22947	6.99531	9.75353	0.57373	9.52406	16.6002	0.35	5.81008	0.7	11.6202
4	7.11829	0.0812786	6.75343	5.58832	0.36486	5.50705	15.0936	0.25	3.7734	0.44	6.64118
5	6.95025	0.0551997	6.59386	3.87001	0.35639	3.81481	10.704	0.15	1.6056	0.36	3.85345
6	7.19079	0.0960454	6.74218	5.44542	0.44861	5.34938	11.9243	0.24	2.86184	0.35	4.17352
7	7.47585	0.185155	6.92945	8.38111	0.5464	8.19596	14.9999	0.26	3.89998	0.57	8.54995
8	7.42493	0.164671	6.90123	7.85383	0.5237	7.68916	14.6824	0.32	4.69836	0.65	9.54355
MW	7.28171	0.130697	6.82494	6.88797	0.45677	6.75728	14.6796	0.25125	3.73879	0.4825	7.122
SEM	0.074469	0.0212474	0.0498891	0.748875	0.0291451	0.728828	1.19462	0.0219933	0.464593	0.0502049	0.94771
MCT4 + CAII-WT
	Intrinsic buffer capacity							Flux (3 mM Lac)		Flux (10 mM Lac)
Cell No.	N 7.0	[HCO3-]	CO2 / HCO3-	[HCO3-]	DpH	d[HCO3-]	bi	DpH/Dt	J(A/B)	DpH/Dt	J(A/B)
1	7.4356	0.168767	6.90432	7.90991	0.53128	7.74115	14.5707	0.43	6.26542	0.74	10.7824
2	7.17789	0.0932345	6.72432	5.22603	0.45357	5.13279	11.3164	0.46	5.20556	0.91	10.2979
3	7.20857	0.100059	6.75432	5.59979	0.45425	5.49973	12.1073	0.48	5.81149	0.94	11.3808
4	7.14458	0.0863508	6.71806	5.15124	0.42652	5.06489	11.8749	0.37	4.39372	0.67	7.95619
5	7.08836	0.0758659	6.7298	5.29239	0.35856	5.21652	14.5485	0.46	6.69232	0.77	11.2024
6	7.11663	0.0809686	6.73055	5.30154	0.38608	5.22057	13.522	0.47	6.35533	0.82	11.088
7	7.2356	0.106485	6.75432	5.59979	0.48128	5.4933	11.4139	0.55	6.27767	1.28	14.6099
8	7.30495	0.124921	6.7913	6.0975	0.51365	5.97258	11.6277	0.55	6.39524	0.94	10.9301
MW	7.21402	0.104581	6.76337	5.77227	0.450649	5.66769	12.6227	0.47125	5.92459	0.88375	11.031
SEM	0.0399249	0.0106911	0.0217915	0.323781	0.0209855	0.313498	0.487242	0.0209964	0.270933	0.0664653	0.641246
MCT4 + CAII-WT + 4-MI
	Intrinsic buffer capacity							Flux (3 mM Lac)		Flux (10 mM Lac)
Cell No.	N 7.0	[HCO3-]	CO2 / HCO3-	[HCO3-]	DpH	d[HCO3-]	bi	DpH/Dt	J(A/B)	DpH/Dt	J(A/B)
1	7.41083	0.15941	6.96044	9.00102	0.45039	8.84161	19.631	0.29	5.69299	0.48	9.42288
2	7.38808	0.151275	6.83784	6.78722	0.55024	6.63594	12.0601	0.38	4.58283	0.65	7.83905
3	7.48413	0.188719	6.89403	7.7247	0.5901	7.53598	12.7707	0.44	5.6191	0.84	10.7274
4	7.40682	0.157945	6.90593	7.93929	0.50089	7.78134	15.535	0.41	6.36936	0.77	11.962
5	7.33614	0.134223	6.78775	6.04786	0.54839	5.91364	10.7836	0.54	5.82316	1.09	11.7542
6	7.16368	0.0902332	6.75842	5.6529	0.40526	5.56267	13.7262	0.32	4.39238	0.69	9.47106
7	7.33829	0.134889	6.88465	7.55965	0.45364	7.42476	16.3671	0.39	6.38316	0.75	12.2753
8	7.24596	0.109055	6.75525	5.61179	0.49071	5.50274	11.2138	0.47	5.2705	0.92	10.3167
MW	7.34674	0.140719	6.84804	7.04055	0.498703	6.89983	14.0109	0.405	5.51669	0.77375	10.4711
SEM	0.0358951	0.0109293	0.0266663	0.431054	0.0218122	0.422786	1.0617	0.0283473	0.26084	0.0647781	0.538519
MCT4+ CAII-E69Q
	Intrinsic buffer capacity							Flux (3 mM Lac)		Flux (10 mM Lac)
Cell No.	N 7.0	[HCO3-]	CO2 / HCO3-	[HCO3-]	DpH	d[HCO3-]	bi	DpH/Dt	J(A/B)	DpH/Dt	J(A/B)
1	7.24809	0.109591	6.68181	4.73873	0.56628	4.62914	8.17464	0.28	2.2889	0.48	3.92383
2	7.10113	0.0781298	6.6285	4.19133	0.47263	4.1132	8.70279	0.35	3.04598	0.6	5.22167
3	7.48303	0.188242	6.8647	7.22024	0.61833	7.032	11.3726	0.34	3.86667	0.55	6.25491
4	7.49752	0.194629	6.91551	8.11637	0.58201	7.92174	13.611	0.34	4.62774	0.56	7.62216
5	7.55494	0.22214	6.93481	8.48519	0.62013	8.26305	13.3247	0.32	4.26391	0.56	7.46184
6	7.20285	0.0987499	6.76799	5.77885	0.43486	5.6801	13.0619	0.14	1.82867	0.22	2.87362
7	7.30295	0.124347	6.81468	6.43475	0.48827	6.3104	12.924	0.19	2.45556	0.38	4.91112
8	7.45853	0.177917	6.87269	7.35431	0.58584	7.17639	12.2497	0.24	2.93994	0.39	4.7774
MW	7.35613	0.149218	6.81009	6.53997	0.546044	6.39075	11.6777	0.275	3.16467	0.4675	5.38082
SEM	0.0581142	0.018668	0.0389124	0.546838	0.0250322	0.529148	0.749541	0.0276457	0.352567	0.0456207	0.584582
MCT4 + CAII-E69Q + 4-MI
	Intrinsic buffer capacity							Flux (3 mM Lac)		Flux (10 mM Lac)
Cell No.	N 7.0	[HCO3-]	CO2 / HCO3-	[HCO3-]	DpH	d[HCO3-]	bi	DpH/Dt	J(A/B)	DpH/Dt	J(A/B)
1	7.17011	0.0915791	6.69783	4.91679	0.47228	4.82521	10.2168	0.4	4.08674	0.82	8.37781
2	7.15585	0.088621	6.71345	5.09685	0.4424	5.00823	11.3206	0.58	6.56594	0.87	9.84891
3	7.2687	0.114918	6.78231	5.97258	0.48639	5.85766	12.0431	0.36	4.33553	0.67	8.0689
4	7.46709	0.181458	6.92911	8.37455	0.53798	8.19309	15.2294	0.27	4.11193	0.48	7.3101
5	7.34092	0.135708	6.84818	6.95075	0.49274	6.81504	13.8309	0.45	6.22391	0.53	7.33038
6	7.2103	0.100458	6.79001	6.07941	0.42029	5.97895	14.2258	0.39	5.54806	0.62	8.81999
7	7.38493	0.150182	6.91366	8.08187	0.47127	7.93168	16.8304	0.29	4.88083	0.59	9.92996
8	7.40682	0.157945	6.90593	7.93929	0.50089	7.78134	15.535	0.51	7.92287	0.87	13.5155
MW	7.30059	0.127609	6.82256	6.67651	0.47803	6.5489	13.654	0.40625	5.45947	0.68125	9.15019
SEM	0.0363033	0.0106142	0.0282354	0.424464	0.011233	0.414204	0.710261	0.0327845	0.427901	0.0480289	0.631626
MCT4 + CAII-D71N
	Intrinsic buffer capacity							Flux (3 mM Lac)		Flux (10 mM Lac)
Cell No.	N 7.0	[HCO3-]	CO2 / HCO3-	[HCO3-]	DpH	d[HCO3-]	bi	DpH/Dt	J(A/B)	DpH/Dt	J(A/B)
1	7.24729	0.10939	6.7989	6.20514	0.44839	6.09575	13.5948	0.43	5.84574	0.88	11.9634
2	7.16881	0.0913054	6.71477	5.11236	0.45404	5.02106	11.0586	0.37	4.09169	0.7	7.74104
3	7.48361	0.188494	6.83206	6.69748	0.65155	6.50899	9.99001	0.44	4.3956	0.95	9.49051
4	7.32763	0.131618	6.88018	7.48224	0.44745	7.35062	16.4278	0.33	5.42118	0.73	11.9923
5	7.34353	0.136526	6.87811	7.44666	0.46542	7.31014	15.7065	0.29	4.5549	0.54	8.48153
6	7.30883	0.126042	6.7711	5.82038	0.53773	5.69434	10.5896	0.44	4.65942	0.79	8.36578
7	7.32954	0.132198	6.83221	6.6998	0.49733	6.5676	13.2057	0.48	6.33874	0.98	12.9416
8	7.38231	0.149278	6.86681	7.2554	0.5155	7.10613	13.7849	0.44	6.06536	0.81	11.1658
MW	7.32394	0.133107	6.82177	6.58993	0.502176	6.45683	13.0447	0.4025	5.17158	0.7975	10.2677
SEM	0.0325958	0.0100922	0.020428	0.296412	0.0243976	0.290836	0.831419	0.0231262	0.30145	0.0507005	0.702059
MCT4 + CAII-D71N + 4-MI
	Intrinsic buffer capacity							Flux (3 mM Lac)		Flux (10 mM Lac)
Cell No.	N 7.0	[HCO3-]	CO2 / HCO3-	[HCO3-]	DpH	d[HCO3-]	bi	DpH/Dt	J(A/B)	DpH/Dt	J(A/B)
1	7.20699	0.0996957	6.7203	5.17788	0.48669	5.07818	10.4341	0.46	4.79969	0.75	7.82559
2	7.20721	0.0997462	6.79027	6.08305	0.41694	5.98331	14.3505	0.43	6.17073	0.71	10.1889
3	7.26242	0.113268	6.79189	6.10579	0.47053	5.99252	12.7357	0.45	5.73106	0.78	9.93383
4	7.38624	0.150635	6.83991	6.81964	0.54633	6.66901	12.2069	0.53	6.46967	0.95	11.5966
5	7.25956	0.112524	6.84461	6.89385	0.41495	6.78132	16.3425	0.33	5.39303	0.52	8.4981
6	7.41123	0.159557	6.8939	7.72239	0.51733	7.56283	14.619	0.36	5.26283	0.78	11.4028
7	7.41822	0.162146	6.94975	8.78217	0.46847	8.62002	18.4004	0.31	5.70411	0.63	11.5922
8	7.32587	0.131086	6.84461	6.89385	0.48126	6.76276	14.0522	0.31	4.35618	0.75	10.5391
MW	7.30972	0.128582	6.83441	6.80983	0.475312	6.68124	14.1427	0.3975	5.48591	0.73375	10.1971
SEM	0.0273881	0.00811114	0.0216853	0.342058	0.0139913	0.335081	0.770332	0.0254269	0.215704	0.038835	0.441834
MCT4 + CAII-D72N
	Intrinsic buffer capacity							Flux (3 mM Lac)		Flux (10 mM Lac)
Cell No.	N 7.0	[HCO3-]	CO2 / HCO3-	[HCO3-]	DpH	d[HCO3-]	bi	DpH/Dt	J(A/B)	DpH/Dt	J(A/B)
1	7.40569	0.157535	6.81555	6.90323	0.59014	6.7457	11.4307	0.28	3.20059	0.58	6.62979
2	7.54072	0.214984	7.00913	7.00913	0.53159	6.79415	12.7808	0.26	3.32301	0.44	5.62355
3	7.31958	0.129201	6.78381	5.99324	0.53577	5.86404	10.9451	0.34	3.72132	0.56	6.12924
4	7.3482	0.138002	6.75953	7.00913	0.58867	6.87113	11.6723	0.22	2.5679	0.38	4.43547
5	7.26352	0.113555	6.79814	7.00913	0.46538	6.89557	14.8171	0.16	2.37073	0.29	4.29695
6	7.19123	0.0961427	6.7275	7.00913	0.46373	6.91299	14.9074	0.28	4.17406	0.49	7.3046
7	7.2957	0.122289	6.77719	7.00913	0.51851	6.88684	13.282	0.22	2.92204	0.43	5.71125
8	7.27298	0.116056	6.76134	7.00913	0.51164	6.89307	13.4725	0.32	4.3112	0.51	6.87098
MW	7.3297	0.135971	6.80402	6.86891	0.525679	6.73294	12.9135	0.26	3.32386	0.46	5.87523
SEM	0.0374823	0.0129771	0.0307705	0.125779	0.0168936	0.125797	0.529135	0.020702	0.250437	0.0339116	0.38551
MCT4 + CAII-D72N
	Intrinsic buffer capacity							Flux (3 mM Lac)		Flux (10 mM Lac)
Cell No.	N 7.0	[HCO3-]	CO2 / HCO3-	[HCO3-]	DpH	d[HCO3-]	bi	DpH/Dt	J(A/B)	DpH/Dt	J(A/B)
1	7.47872	0.186383	7.00195	9.90379	0.47677	9.71741	20.3818	0.28	5.70689	0.67	13.6558
2	7.31332	0.127352	6.85467	7.0554	0.45865	6.92805	15.1053	0.35	5.28686	0.59	8.91213
3	7.43833	0.169831	6.86989	7.30704	0.56844	7.13721	12.5558	0.53	6.65457	0.98	12.3047
4	7.45938	0.178265	6.85515	7.0632	0.60423	6.88494	11.3946	0.3	3.41837	0.59	6.72279
5	7.30384	0.124602	6.84844	6.95491	0.4554	6.83031	14.9985	0.24	3.59964	0.43	6.44935
6	7.30721	0.125573	6.84844	6.80127	0.45877	6.6757	14.5513	0.47	6.83911	0.73	10.6224
7	7.40498	0.157277	6.84496	6.80127	0.56002	6.64399	11.8638	0.41	4.86418	0.95	11.2707
8	7.31364	0.127446	6.85332	6.80127	0.46032	6.67382	14.4982	0.44	6.37922	0.88	12.7584
MW	7.37743	0.149591	6.8721	7.33602	0.505325	7.18643	14.4187	0.3775	5.3436	0.7275	10.337
SEM	0.0267157	0.0092879	0.0187397	0.372026	0.0217274	0.366222	0.995819	0.0358444	0.465615	0.0689397	0.962782
