# Supplementary material for: A surface proton antenna in carbonic anhydrase II supports lactate transport in cancer cells
Source: eLife. 2018 May 29;7:e35176. doi: 10.7554/eLife.35176 (PMC5986270; doi:10.7554/eLife.35176)
Supplement: Figure 6—source data 1. [file elife-35176-fig6-data1.xlsx]

## Sheet: Figure 6
Figure 6
Quantification of the pull-down assay
Quantification of the GST Signal
	Blot #1		Blot #2		Blot #3		Blot #4
	Intensity	Normalised	Intensity	Normalised	Intensity	Normalised	Intensity	Normalised
GST	12948.1	1.71207	16570.9	1.27524	16823.3	1.08475	16982.6	0.97461
GST-MCT1.CT + CAII-WT	7562.84	1	12994.3	1	15508.9	1	17425	1
GST-MCT1.CT + CAII-E69Q	9245.15	1.22244	11082.6	0.852885	11659.1	0.751765	7788.88	0.446995
GST-MCT1.CT + CAII-D71N	7465.28	0.9871	12676	0.975504	14497.5	0.934788	6728.23	0.386125
GST-MCT1.CT + CAII-D72N	7354.91	0.972506	13555.3	1.04317	13222.2	0.852558	7834.76	0.449628
Quantification of the CAII Signal
	Blot #1		Blot #2		Blot #3		Blot #4
	Intensity	Normalised	Intensity	Normalised	Intensity	Normalised	Intensity	Normalised
GST	973.991	0.123	173.385	0.0207823	270.184	0.0267131	170.257	0.0158899
GST-MCT1.CT + CAII-WT	7918.62	1	8342.91	1	10114.3	1	10714.8	1
GST-MCT1.CT + CAII-E69Q	8939.69	1.12895	9681.33	1.16043	10300	1.01836	3815.5	0.356095
GST-MCT1.CT + CAII-D71N	7257.87	0.916557	7181.28	0.860764	9659.4	0.955026	3331.67	0.31094
GST-MCT1.CT + CAII-D72N	7680.45	0.969923	10526.3	1.26171	8761.76	0.866277	4070.79	0.379921
Normalization CAII to GST
	Blot #1	Blot #2	Blot #3	Blot #4	MW	SEM	MW (%)	SEM (%)
GST	0.071843	0.0162968	0.0246261	0.0163038	0.0322674	0.013337	3.22674	1.3337
GST-MCT1.CT + CAII-WT	1	1	1	1	1	0	100	0
GST-MCT1.CT + CAII-E69Q	0.923515	1.36059	1.35463	0.796642	1.10884	0.145946	110.884	14.5946
GST-MCT1.CT + CAII-D71N	0.928535	0.882379	1.02165	0.805283	0.909462	0.0452186	90.9462	4.52186
GST-MCT1.CT + CAII-D72N	0.997343	1.20949	1.01609	0.844968	1.01697	0.0747407	101.697	7.47407
Quantification of the GST Signal
	Blot #1		Blot #2		Blot #3		Blot #4
	Intensity	Normalised	Intensity	Normalised	Intensity	Normalised	Intensity	Normalised
GST	9526.45	1.56486	16635.9	1.27172	16664.1	1.35622	24059.4	0.959903
GST-MCT4.CT + CAII-WT	6087.72	1	13081.3	1	12287.2	1	25064.4	1
GST-MCT4.CT + CAII-E69Q	7212.67	1.18479	10998.3	0.840766	10668.5	0.868264	18374.7	0.7331
GST-MCT4.CT + CAII-D71N	6587.12	1.08203	9860.57	0.753789	11300.6	0.919704	23346.7	0.931467
GST-MCT4.CT + CAII-D72N	6155.55	1.01114	11544.9	0.88255	9027.1	0.734676	21606.5	0.862039
Quantification of the CAII Signal
	Blot #1		Blot #2		Blot #3		Blot #4
	Intensity	Normalised	Intensity	Normalised	Intensity	Normalised	Intensity	Normalised
GST	145.456	0.0288454	2466.43	0.198364	470.184	0.083575	1180.73	0.0615582
GST-MCT4.CT + CAII-WT	5042.6	1	12433.9	1	5625.89	1	19180.7	1
GST-MCT4.CT + CAII-E69Q	6496.18	1.28826	10747.5	0.864371	6506.06	1.15645	17096.6	0.891343
GST-MCT4.CT + CAII-D71N	5623.16	1.11513	13981	1.12443	5419.94	0.963392	18162.5	0.946916
GST-MCT4.CT + CAII-D72N	4874.23	0.966612	16886.4	1.3581	5775.33	1.02656	18670.6	0.973402
Normalization CAII to GST
	Blot #1	Blot #2	Blot #3	Blot #4	MW	SEM	MW (%)	SEM (%)
GST	0.0184332	0.15598	0.0616237	0.0641296	0.0750416	0.0289463	7.50416	2.89463
GST-MCT4.CT + CAII-WT	1	1	1	1	1	0	100	0
GST-MCT4.CT + CAII-E69Q	1.08733	1.02808	1.33191	1.21585	1.16579	0.0678377	116.579	6.78377
GST-MCT4.CT + CAII-D71N	1.03059	1.4917	1.0475	1.01659	1.18526	0.11521	118.526	11.521
GST-MCT4.CT + CAII-D72N	0.95596	1.53884	1.3973	1.12919	1.25532	0.131043	125.532	13.1043
