# Supplementary material for: A surface proton antenna in carbonic anhydrase II supports lactate transport in cancer cells
Source: eLife. 2018 May 29;7:e35176. doi: 10.7554/eLife.35176 (PMC5986270; doi:10.7554/eLife.35176)
Supplement: Figure 7—source data 1. [file elife-35176-fig7-data1.xlsx]

## Sheet: Figure 7 B
Figure 7
Carbonic anhydrase catalytic activity
Native					CAII-WT					CAII-H64A					CAII-E69Q
Batch No.	LEs	LEca	U/ml		Batch No.	LEs	LEca	U/ml		Batch No.	LEs	LEca	U/ml		Batch No.	LEs	LEca	U/ml
1	-0.03915	-0.05686	2.71418		1	-0.02642	-0.16708	31.944		1	-0.02432	-0.05418	7.36678		1	-0.02771	-0.12539	21.1505
2	-0.04193	-0.054	1.72716		2	-0.02198	-0.14172	32.6861		2	-0.0282	-0.06865	8.60638		2	-0.02367	-0.11531	23.2294
3	-0.01993	-0.0243	1.3156		3	-0.02305	-0.14816	32.5666		3	-0.02618	-0.07787	11.8464		3	-0.02977	-0.15847	25.9389
4	-0.03915	-0.05686	2.71418		4	-0.02966	-0.26033	46.6628		4	-0.03179	-0.06988	7.18905		4	-0.02964	-0.1496	24.2834
5	-0.02035	-0.02503	1.37985		5	-0.03028	-0.19215	32.0746		5	-0.03001	-0.07145	8.28524		5	-0.03177	-0.17075	26.2474
6	-0.029	-0.03228	0.678621		6	-0.02541	-0.14727	28.7745		6	-0.03178	-0.06499	6.26998		6	-0.02334	-0.15075	32.7532
					7	-0.02919	-0.24833	45.0442							7	-0.02426	-0.14807	30.6208
MW	-0.031585	-0.041555	1.75493		8	-0.04131	-0.27493	33.9317		MW	-0.0287133	-0.0678367	8.26065		8	-0.03029	-0.17263	28.1954
SEM	0.00404238	0.00653248	0.333327		9	-0.07674	-0.4099	26.0485		SEM	0.00124545	0.00323094	0.793477		9	-0.03897	-0.25851	33.8014
					10	-0.07569	-0.44836	29.5418
					11	-0.0703	-0.41836	29.7064							MW	-0.0288244	-0.161053	27.3578
															SEM	0.00164164	0.0136945	1.44459
					MW	-0.0409118	-0.25969	33.5438
					SEM	0.00664819	0.0351399	1.9554
CAII-D71N					CAII-D72N					CAII-E69Q/D72N
Batch No.	LEs	LEca	U/ml		Batch No.	LEs	LEca	U/ml		Batch No.	LEs	LEca	U/ml
1	-0.02142	-0.12286	28.4146		1	-0.03811	-0.22568	29.5308		1	-0.09457	-0.57806	30.6751
2	-0.0254	-0.18461	37.6087		2	-0.03442	-0.21196	30.9483		2	-0.0848	-0.5582	33.4953
3	-0.02012	-0.14236	36.4533		3	-0.03204	-0.20894	33.1273		3	-0.07019	-0.44133	31.7259
4	-0.03748	-0.26693	36.7316		4	-0.03375	-0.18077	26.1369		4	-0.07162	-0.51404	37.0639
5	-0.03296	-0.25502	40.4235		5	-0.0239	-0.12949	26.5079		5	-0.07403	-0.43423	29.1936
6	-0.03938	-0.28728	37.7704		6	-0.03107	-0.18509	29.7432		6	-0.06483	-0.43759	34.4988
										7	-0.07296	-0.44335	30.4597
MW	-0.02946	-0.209843	36.2337		MW	-0.032215	-0.190322	29.3324
SEM	0.00338298	0.0283155	1.66575		SEM	0.00193606	0.014005	1.08642		MW	-0.0761429	-0.486686	32.4446
										SEM	0.00382029	0.0235579	1.03302

## Sheet: Figure 7 C+D
Figure 7
Rate of change in intracellular H-concentration (DH/Dt) during application / removal of CO2
Native				CAII-WT				CAII-H64A				CAII-E69Q
Cell No.	+ CO2	- CO2		Cell No.	+ CO2	- CO2		Cell No.	+ CO2	- CO2		Cell No.	+ CO2	- CO2
1	29.3	32		1	170.8	103.4		1	126.7	67.3		1	154.9	90.7
2	37.3	40.9		2	260.1	160.2		2	35	26.7		2	258.6	124.4
3	52.1	52.6		3	192.4	162.6		3	153.4	109.8		3	221.7	175.2
4	54	47.4		4	252.2	196.7		4	130.3	112.5		4	171.7	162.9
5	47.5	39.4		5	134.2	104.7		5	95.2	112.8		5	172.1	162.9
6	40.8	49.2		6	191.1	217.1		6	205.2	99.8		6	237	215.2
7	42.2	31.6		7	235.6	126.6		7	131.2	70.3		7	222.4	185.5
8	31.4	39.2		8	222.1	226.5		8	89.8	88.9		8	210.5	177.1
MW	41.825	41.5375		MW	207.312	162.225		MW	120.85	86.0125		MW	206.113	161.737
SEM	3.19943	2.72429		SEM	15.2269	17.0995		SEM	17.6257	10.6053		SEM	12.8176	13.551
CAII-D71N				CAII-D72N				CAII-E69Q/N72N
Cell No.	+ CO2	- CO2		Cell No.	+ CO2	- CO2		Cell No.	+ CO2	- CO2
1	177	99.3		1	173	106.4		1	158	100.1
2	159.8	144		2	174.8	134		2	197.6	158
3	317.8	234.9		3	254.5	170.7		3	355.8	276.2
4	257.4	194.9		4	205.6	227.4		4	252.7	176.7
5	217.4	158.6		5	159	169.7		5	165.8	102.6
6	205.3	183		6	251.7	156.9		6	182.5	167.2
7	107.2	115.4		7	157.2	116.2		7	138.8	112.3
8	175.6	147.5		8	254.6	170.7		8	179.7	162.1
MW	202.188	159.7		MW	203.8	156.5		MW	203.863	156.9
SEM	22.6843	15.4943		SEM	15.4787	13.5257		SEM	24.7613	20.232
