# Supplementary material for: A surface proton antenna in carbonic anhydrase II supports lactate transport in cancer cells
Source: eLife. 2018 May 29;7:e35176. doi: 10.7554/eLife.35176 (PMC5986270; doi:10.7554/eLife.35176)
Supplement: Figure 8—source data 1. [file elife-35176-fig8-data1.xlsx]

## Sheet: Figure 8 C+D
Figure 8
Rate of change in intracellular H-concentration (DH/Dt) during application / removal of lactate in MCT1 expressing oocytes
MCT1						MCT1 + CAII-WT
Cell No.	+ 3 mM Lac	- 3 mM Lac	+ 10 mM Lac	- 10 mM Lac		Cell No.	+ 3 mM Lac	- 3 mM Lac	+ 10 mM Lac	- 10 mM Lac
1	35.52	-37.33	72.67	-70.69		1	31.5	-29.64	62.96	-56.91
2	26.93	-29.53	58.05	-67.03		2	61.75	-66.67	161.7	-167.5
3	29.4	-34.49	54.86	-70.51		3	83.23	-86.56	162.04	-161.03
4	30.2	-34.05	43.08	-55.44		4	81.66	-68.19	161.02	-145.06
5	24.58	-27.67	37.72	-54.21		5	46.91	-54.24	98.71	-92.11
6	40.73	-50.62	100.05	-98.67		6	69.9	-73.43	146.97	-149.31
7	39.33	-43	82.25	-83.3		7	64.45	-56.75	136.74	-126.57
8	51.14	-51.22	106.7	-87.3		8	51.68	-52.6	128.38	-111.14
MW	34.7287	-38.4887	69.4225	-73.3937		MW	61.385	-61.01	132.315	-126.204
SEM	3.10491	3.17339	9.00706	5.47214		SEM	6.22084	5.99022	12.5073	13.3622
MCT1 + CAII-H64A						MCT1 + CAII-H64K
Cell No.	+ 3 mM Lac	- 3 mM Lac	+ 10 mM Lac	- 10 mM Lac		Cell No.	+ 3 mM Lac	- 3 mM Lac	+ 10 mM Lac	- 10 mM Lac
1	41.5	-37.33	70.13	-65.9		1	33.65	-31.62	58.92	-58.74
2	28.74	-28.23	62.64	-65.35		2	72.65	-68.72	155.48	-134.43
3	37.91	-39.98	67.61	-61.3		3	58.53	-52.67	109.62	-108.78
4	55.12	-52.09	95.7	-110.46		4	78.18	-75.95	162.48	-134.04
5	60.24	-62.76	114.5	-99.82		5	71.53	-58.19	155.52	-120.06
6	34.73	-34.55	62.64	-64.68		6	76.08	-76.78	122.36	-88.15
7	30.18	-36.12	59.03	-62.87		7	62.66	-64.13	124.78	-107.76
8	34.96	-32.9	61.89	-65.11		8	59.44	-49.77	131.66	-119.2
MW	40.4225	-40.495	74.2675	-74.4363		MW	64.09	-59.7287	127.602	-108.895
SEM	4.0529	4.01572	7.06504	6.79545		SEM	5.09217	5.3378	11.8514	8.92662

## Sheet: Figure 8 F
Figure 8
Quantification of the pull-down assay
Quantification of the GST Signal
	Blot #1		Blot #2		Blot #3		Blot #4
	Intensity	Normalised	Intensity	Normalised	Intensity	Normalised	Intensity	Normalised
GST	7013.31	0.650771	11571.9	0.682501	9073.28	0.614662	16982.6	0.97461
GST-MCT1.CT + CAII-WT	10776.9	1	16955.2	1	14761.4	1	17425	1
GST-MCT1.CT + CAII-H64A	11265.6	1.04534	19106.8	1.1269	14738.9	0.998477	12788.9	0.73394
GST-MCT1.CT + CAII-H64K	14029.6	1.30182	20538.8	1.21136	14531.6	0.984434	6728.23	0.386125
Quantification of the CAII Signal
	Blot #1		Blot #2		Blot #3		Blot #4
	Intensity	Normalised	Intensity	Normalised	Intensity	Normalised	Intensity	Normalised
GST	613.284	0.0579786	288.506	0.0345854	688.042	0.042518	170.257	0.0158899
GST-MCT1.CT + CAII-WT	10577.8	1	8341.84	1	16182.4	1	10714.8	1
GST-MCT1.CT + CAII-H64A	772.426	0.0730236	156.254	0.0187314	2333.3	0.144188	1815.5	0.169438
GST-MCT1.CT + CAII-H64K	12037.5	1.138	9374.38	1.12378	12206.8	0.754325	5331.67	0.497597
Normalization CAII to GST
	Blot #1	Blot #2	Blot #3	Blot #4	MW	SEM	MW (%)	SEM (%)
GST	0.0890922	0.0506745	0.069173	0.0163038	0.0563109	0.0154714	5.63109	1.54714
GST-MCT1.CT + CAII-WT	1	1	1	1	1	0	100	0
GST-MCT1.CT + CAII-H64A	0.0698561	0.016622	0.144408	0.230861	0.115437	0.046551	11.5437	4.6551
GST-MCT1.CT + CAII-H64K	0.874162	0.927701	0.766252	1.28869	0.994216	0.113254	99.4216	11.3254

## Sheet: Figure 8-1 C+D
Figure 8 - Figure Supplement 1
Rate of change in intracellular H-concentration (DH/Dt) during application / removal of lactate in MCT4 expressing oocytes
MCT4						MCT4 + CAII-WT
Cell No.	+ 3 mM Lac	- 3 mM Lac	+ 10 mM Lac	- 10 mM Lac		Cell No.	+ 3 mM Lac	- 3 mM Lac	+ 10 mM Lac	- 10 mM Lac
1	25.95	-25.11	56.78	-62.8		1	35.69	-33.42	77.13	-76.45
2	27.69	-26.2	61.08	-54.01		2	47.26	-50.84	101.22	-103.46
3	24.54	-23.17	56.5	-50.94		3	79.37	-73.82	177.57	-186.84
4	32.72	-28.01	66.08	-54.44		4	64.07	-62.76	125.07	-119.82
5	32.27	-38.78	69.17	-69.46		5	50.91	-50.86	108.38	-100.55
6	22.71	-23.75	54.62	-50.59		6	70.92	-69.87	157.51	-157.5
7	43.92	-38.78	78.02	-59.46		7	65.89	-67.56	161.27	-150.89
8	27.19	-30.05	60.68	-72.74		8	83.41	-86.64	145.23	-144.52
MW	29.6238	-29.2313	62.8663	-59.305		MW	62.19	-61.9712	131.672	-130.004
SEM	2.38213	2.22596	2.78146	2.96856		SEM	5.81143	5.83359	12.1907	12.8015
MCT4 + CAII-H64A						MCT4 + CAII-H64K
Cell No.	+ 3 mM Lac	- 3 mM Lac	+ 10 mM Lac	- 10 mM Lac		Cell No.	+ 3 mM Lac	- 3 mM Lac	+ 10 mM Lac	- 10 mM Lac
1	21.15	-20.43	67.16	-66.03		1	43.13	-41.34	101.32	-95.45
2	40.89	-35.18	76.86	-73.11		2	64.54	-58.71	120.27	-107.83
3	60.24	-62.76	114.5	-99.82		3	49.18	-53.24	136.7	-139.15
4	44.91	-41.62	85.15	-86.19		4	65.32	-67.11	140.63	-150.38
5	25.18	-23.64	53.74	-58.44		5	54.98	-54.25	101.04	-98.94
6	37.18	-39.77	65.77	-65.63		6	85.65	-79.65	161.78	-153.93
7	28.74	-28.23	62.64	-65.35		7	61.37	-58.59	137.91	-123.37
8	30.18	-36.12	59.03	-62.87		8	50.58	-55.72	117.74	-114.24
MW	36.0588	-35.9688	73.1062	-72.18		MW	59.3438	-58.5763	127.174	-122.911
SEM	4.46498	4.66396	6.87191	4.93521		SEM	4.66919	3.94014	7.40744	8.03117

## Sheet: Figure 8-1 F
Figure 8 - Figure Supplement 1
Quantification of the pull-down assay
Quantification of the GST Signal
	Blot #1		Blot #2		Blot #3		Blot #4
	Intensity	Normalised	Intensity	Normalised	Intensity	Normalised	Intensity	Normalised
GST	6390.01	0.477347	11668.6	0.563935	9529.48	0.825734	18774.6	1.31393
GST-MCT1.CT + CAII-WT	13386.5	1	20691.5	1	11540.6	1	14288.9	1
GST-MCT1.CT + CAII-H64A	11951.6	0.892806	19367.9	0.936035	8821.84	0.764417	12079.1	0.84535
GST-MCT1.CT + CAII-H64K	8517.5	0.636274	14783.1	0.714453	6454.01	0.559243	10973.2	0.767949
Quantification of the CAII Signal
	Blot #1		Blot #2		Blot #3		Blot #4
	Intensity	Normalised	Intensity	Normalised	Intensity	Normalised	Intensity	Normalised
GST	105.456	0.0151386	69.277	0.00703574	635.335	0.0395447	1180.73	0.0893514
GST-MCT1.CT + CAII-WT	6966.01	1	9846.45	1	16066.2	1	13214.5	1
GST-MCT1.CT + CAII-H64A	106.184	0.0152432	83.192	0.00844894	2472.01	0.153864	1614.26	0.122158
GST-MCT1.CT + CAII-H64K	4368.94	0.62718	10641.6	1.08076	12454.9	0.77522	8393.01	0.635138
Normalization CAII to GST
	Blot #1	Blot #2	Blot #3	Blot #4	MW	SEM	MW (%)	SEM (%)
GST	0.0317141	0.0124761	0.0478904	0.0680034	0.040021	0.0118063	4.0021	1.18063
GST-MCT1.CT + CAII-WT	1	1	1	1	1	0	100	0
GST-MCT1.CT + CAII-H64A	0.0170733	0.00902631	0.201283	0.144506	0.092972	0.0476046	9.2972	4.76046
GST-MCT1.CT + CAII-H64K	0.985706	1.5127	1.3862	0.827057	1.24199	0.16215	124.199	16.215

## Sheet: Figure 8-2
Figure 8 - Figure Supplement 2
Carbonic anhydrase catalytic activity
Native					CAII-WT					CAII-H64A					CAII-H64K
Batch No.	LEs	LEca	U/ml		Batch No.	LEs	LEca	U/ml		Batch No.	LEs	LEca	U/ml		Batch No.	LEs	LEca	U/ml
1	-0.03915	-0.05686	2.71418		1	-0.02642	-0.16708	31.944		1	-0.02432	-0.05418	7.36678		1	-0.02578	-0.09979	17.225
2	-0.02035	-0.02503	1.37985		2	-0.02198	-0.14172	32.6861		2	-0.0282	-0.06865	8.60638		2	-0.02376	-0.10233	19.8409
3	-0.029	-0.03228	0.678621		3	-0.02305	-0.14816	32.5666		3	-0.02618	-0.07787	11.8464		3	-0.02822	-0.10698	16.7456
4	-0.03915	-0.05686	2.71418		4	-0.02966	-0.26033	46.6628		4	-0.03179	-0.06988	7.18905		4	-0.03078	-0.13546	20.4055
5	-0.04193	-0.054	1.72716		5	-0.03028	-0.19215	32.0746		5	-0.03001	-0.07145	8.28524		5	-0.03467	-0.12211	15.1324
6	-0.01993	-0.0243	1.3156		6	-0.02541	-0.14727	28.7745		6	-0.03178	-0.06499	6.26998		6	-0.02916	-0.12005	18.7016
					7	-0.02919	-0.24833	45.0442							7	-0.0293	-0.14151
MW	-0.031585	-0.041555	1.75493		8	-0.04131	-0.27493	33.9317
SEM	0.00404238	0.00653248	0.333327							MW	-0.0287133	-0.0678367	8.26065		MW	-0.02881	-0.118319	18.0085
					MW	-0.0284125	-0.197496	35.4606		SEM	0.00124545	0.00323094	0.793477		SEM	0.00132391	0.00612674	0.817812
					SEM	0.00213438	0.0196167	2.33101
Quantification of protein expression in oocytes
Quantification of the tubulin Signal
	Blot #1		Blot #2		Blot #3		Blot #4
	Intensity	Normalised	Intensity	Normalised	Intensity	Normalised	Intensity	Normalised
Nativ	12814	1.06631	7371.33	0.712178	11820.3	0.982183	13767.3	0.970103
CAII-WT	12017.1	1	10350.4	1	12034.7	1	14191.6	1
CAII-H64A	7491.67	0.623417	11338.8	1.0955	7694.55	0.639364	14085.8	0.992539
CAII-H64K	8838.03	0.735454	10899.2	1.05302	9062.74	0.753051	9264.03	0.652781
Quantification of the CAII Signal
	Blot #1		Blot #2		Blot #3		Blot #4
	Intensity	Normalised	Intensity	Normalised	Intensity	Normalised	Intensity	Normalised
Nativ	38.121	0.00283626	2037.45	0.0975203	993.941	0.0673546	137.447	0.0089633
CAII-WT	13440.6	1	20892.6	1	14756.8	1	15334.4	1
CAII-H64A	9038.45	0.672474	16517.7	0.790602	12291.7	0.832951	18355.9	1.19704
CAII-H64K	9040.4	0.672619	14839.8	0.710289	16110.4	1.09172	9272.59	0.604691
Normalization CAII to tubulin
	Blot #1	Blot #2	Blot #3	Blot #4	MW	SEM	MW (%)	SEM (%)
Nativ	0.00265988	0.136932	0.0685765	0.00923954	0.0543521	0.0312638	5.43521	3.12638
CAII-WT	1	1	1	1	1	0	100	0
CAII-H64A	1.07869	0.721684	1.30278	1.20603	1.0773	0.127108	107.73	12.7108
CAII-H64K	0.914563	0.674526	1.44973	0.926331	1.01686	0.163456	101.686	16.3456
