# Supplementary material for: A surface proton antenna in carbonic anhydrase II supports lactate transport in cancer cells
Source: eLife. 2018 May 29;7:e35176. doi: 10.7554/eLife.35176 (PMC5986270; doi:10.7554/eLife.35176)
Supplement: Figure 9—source data 1. [file elife-35176-fig9-data1.xlsx]

## Sheet: Figure 9
Figure 9
Rate of change in intracellular H-concentration (DH/Dt) during application / removal of lactate in MCT1 expressing oocytes
MCT1				MCT1 + CAII-WT				MCT1 + CAII-H3A				MCT1 + CAII-H4A				MCT1 + CAII-H10A				MCT1 + CAII-H15A				MCT1 + CAII-H3A/H4A				MCT1 + CAII-H3A/H4A/H10A				MCT1 + CAII-K9A
Cell No.	+ 3 mM Lac	+ 10 mM Lac		Cell No.	+ 3 mM Lac	+ 10 mM Lac		Cell No.	+ 3 mM Lac	+ 10 mM Lac		Cell No.	+ 3 mM Lac	+ 10 mM Lac		Cell No.	+ 3 mM Lac	+ 10 mM Lac		Cell No.	+ 3 mM Lac	+ 10 mM Lac		Cell No.	+ 3 mM Lac	+ 10 mM Lac		Cell No.	+ 3 mM Lac	+ 10 mM Lac		Cell No.	+ 3 mM Lac	+ 10 mM Lac
1	10.56	16.71		1	76.43	112.54		1	75.66	128.27		1	114.1	183.9		1	101.8	210.7		1	57.94	113.76		1	80.53	172.21		1	99.58	102.64		1	25.8	146.57
2	20.2	36.91		2	67.92	126.68		2	107.74	181.18		2	82.61	153.53		2	88.7	150.22		2	87.87	162.33		2	20.44	39.19		2	55.08	80.53		2	63.88	193.38
3	23.81	39.62		3	38.2	63.49		3	131.2	214.17		3	66.48	134.92		3	115.04	165.6		3	33.91	60.28		3	54.29	98.5		3	28.51	91.43		3	62.55	121.21
4	9.8	17.44		4	54.39	90.04		4	77.49	145.25		4	119.4	200.95		4	131.51	227.87		4	53.79	84.07		4	98.94	178.32		4	36.69	111.81		4	79.59	143.9
5	30.64	52.03		5	26.13	55.08		5	120.66	252.03		5	53.28	90.53		5	62.86	126.76		5	50.36	150.02		5	85.38	151.05		5	60.03	140.46		5	39.6	62.55
6	32.75	61.3		6	84.08	149.51		6	90.29	123.17		6	55.46	137.36		6	33.48	92.61		6	34.14	73.46		6	46.15	78.34		6	60.29	197.75		6	75.33	135.46
7	9.39	16.01		7	76.83	195.3		7	123.59	309.65		7	48.75	66.08		7	14.14	43.48		7	26.84	76.75		7	68.93	197.66						7	31.65	52.94
8	19.39	22.91		8	47.99	107.38		8	121.18	41.39		8	34.05	56.67		8	94.38	179.26		8	97.63	101.26		8	50.74	124.65		MW	56.6967	120.77		8	21.35	145.01
9	10.78	19.16		9	33.43	52.57		9	34.47	82.76		9	13.86	39.73		9	17.45	32.27						9	22.18	32.85		SEM	10.1001	17.5145		9	51.17	83.57
10	7.08	14.97		10	52.13	162.12		10	16.11	35.04		10	28.1	82.09		10	19.31	40.91		MW	55.31	102.741										10	34.17	71.11
11	9.39	28.14		11	51.68	80.09		11	40.11	61.81		11	59.87	138.2		11	49.56	79.27		SEM	9.06478	13.0891		MW	58.62	119.197						11	58.32	107.83
12	19.9	46.53		12	53.91	239.57		12	51.67	118.7		12	35.12	78.1		12	46.37	53.57						SEM	9.09065	20.2283						12	21.78	28.13
13	16.45	27.06		13	26.6	67.65		13	54.72	66.93		13	113.07	249.47
14	30.09	72.63		14	29.68	69.76		14	23.07	54.37		14	37.15	60.76		MW	64.55	116.877														MW	47.0992	107.638
15	5.86	19.78		15	47.07	142.65		15	50.48	105.99		15	34.75	74.59		SEM	11.7496	20.0236														SEM	5.98942	13.9797
16	11.84	16		16	73.85	169.11		16	16.2	26.77
17	21.4	28.91		17	68.43	166.2						MW	59.7367	116.459
18	13.81	25.52		18	80.5	103.04		MW	70.915	121.717		SEM	8.62298	15.7637
				19	89.54	128.5		SEM	10.1696	20.5003
MW	16.8411	31.2017		20	77.07	130.53
SEM	1.98239	4.01283		21	99.81	180.06
				22	84.65	162.99
				23	15.49	26.67
				24	31.31	46.03
				25	56.51	63.22
				26	67.07	216.42
				27	109.88	296.84
				28	24.93	38.73
				MW	58.7682	122.956
				SEM	4.69318	12.4882
